# Supplementary material for: Different pruning level effects on flowering period and chlorophyll fluorescence parameters of Loropetalum chinense var. rubrum
Source: PeerJ journal article supplement (doi:10.7717/peerj.13406), 2022-05-10
Supplement: File1.zip [file File1.zip]

## Sheet: Sheet1
		Hei Zhenzhu					Xiangnong Xiangyun					Da Yehong
		A	B	C	CK		A	B	C	CK		A	B	C	CK
20201025	14	0	0	0	0		1	0	0	0		0	0	0	0
20201028	17	0	0	0	0		1	0	0	0		0	0	0	0
20201031	20	0	0	4	0		2	16	3	0		0	10	5	0
20201103	23	0	0	4	1		15	32	6	1		0	9	4	0
20201106	26	0	0	3	1		18	23	5	1		0	2	0	0
20201109	29	0	0	0	1		9	4	2	0		0	0	0	0
20201112	32	0	0	0	1		10	0	0	1		0	0	0	0
20201115	35	0	0	0	0		5	0	0	5		0	0	0	0
20201118	38	0	0	0	0		2	0	0	5		0	0	0	0
		Time of first bloom(unit:day)
		A	B	C	CK		A	B	C	CK		A	B	C	CK
		0	0	19	23		13	20	19	22		0	18	19	0
		0	0	19	23		14	20	20	22		0	19	20	0
		0	0	20	22		14	20	20	23		0	20	19	0
		0	0	20	22		15	18	19	23		0	20	20	0
		0	0	21	23		13	20	20	23		0	20	20	0
