# Supplementary material for: Different pruning level effects on flowering period and chlorophyll fluorescence parameters of Loropetalum chinense var. rubrum
Source: PeerJ journal article supplement (doi:10.7717/peerj.13406), 2022-05-10
Supplement: File2.zip [file File2.zip]

## Sheet: Sheet1
					Initial bloom stage(C)							Blooming stage(S)							Final bloom stage(M)
	ums	ms	lg ms	lg time	Hei Zhenzhu	ERROR	Xiangnong Xiangyun	ERROR	Da Yehong	ERROR		Hei Zhenzhu	ERROR	Xiangnong Xiangyun	ERROR	Da Yehong	ERROR		Hei Zhenzhu	ERROR	Xiangnong Xiangyun	ERROR	Da Yehong	ERROR
					HZZ		CY		DYH			HZZ		CY		DYH			HZZ		CY		DYH
11	10	0.01	-2	-2	162	0	195	0	195	0		162	0	205.667	15.0849	184	15.5563		162	0	162	0	195	0
21	20	0.02	-1.69897	-1.69897	6805	119.869	7629	152.452	7607.33	313.03		7401.33	168.763	8734	1043.63	8398.33	467.862		7867	231.337	8604	464.139	8084	146.249
31	30	0.03	-1.52288	-1.52288	7130	145.952	8019	152.452	8008	327.463		7791.33	191.836	9200	1150.98	8842.33	497.22		8268	237.947	9048.67	475.115	8528	155.72
41	40	0.04	-1.39794	-1.39794	7314.33	159.625	8224.67	165.696	8235.33	353.373		7997.33	207.359	9503.33	1212.2	9113.33	531.607		8506.33	246.328	9330	486.415	8788	155.72
51	50	0.05	-1.30103	-1.30103	7477	159.217	8452.33	165.74	8463.33	379.721		8192.33	207.359	9785.33	1288.5	9373.33	557.227		8723.33	261.799	9612	498.279	9048.67	176.789
61	60	0.06	-1.22185	-1.22185	7650.67	172.446	8658.33	179.406	8690.67	405.792		8398	222.416	10078	1357.84	9644.67	591.782		8951	262.268	9893.67	510.412	9319.33	191.836
71	70	0.07	-1.1549	-1.1549	7845.67	199.368	8875	191.355	8929.33	420.076		8625.67	245.602	10359.7	1434.38	9926.33	621.95		9189.33	268.547	10197	534.682	9601.33	200.928
81	80	0.08	-1.09691	-1.09691	8019	198.969	9103	191.355	9189	446.059		8842.33	253.267	10684.7	1504.24	10219	667.517		9438.33	261.799	10500.7	532.689	9904.33	216.358
91	90	0.09	-1.04576	-1.04576	8214	225.895	9341.33	216.185	9449.33	472.187		9070	277.085	11009.7	1596.04	10511.3	688.444		9677	268.332	10836.7	546.819	10208	231.337
101	100	0.1	-1	-1	8409	225.895	9557.67	202.881	9698.67	483.792		9308.33	292.299	11334.7	1687.86	10804	734.244		9948	275.772	11150.7	571.198	10522.3	237.734
111	110	0.11	-0.958607	-0.958607	8604.33	252.41	9796.33	216.185	9959	501.141		9536.33	292.299	11660	1757.51	11107.7	773.351		10208	299.409	11486.7	570.781	10825.7	253.01
121	120	0.12	-0.920819	-0.920819	8810	265.361	10034.7	215.681	10218.7	527.128		9807	307.325	11985	1825.37	11400	816.357		10490	291.328	11823	597.318	11139.7	261.799
131	130	0.13	-0.886057	-0.886057	9027	278.942	10262	241.901	10489.7	524.415		10045.3	323.296	12310.3	1894.98	11714.3	846.388		10739	306.884	12148	597.318	11476	299.409
141	140	0.14	-0.853872	-0.853872	9232.67	291.898	10511.3	240.186	10739	553.253		10284	338.332	12646.3	1956.4	11996	876.898		11031.3	306.413	12483.3	624.231	11779.3	314.698
151	150	0.15	-0.823909	-0.823909	9449.33	305.463	10728.3	253.338	10988.3	564.828		10533	347.38	12949.7	2017.62	12288.3	921.24		11313.3	321.969	12830.7	637.604	12093.7	321.969
161	160	0.16	-0.79588	-0.79588	9644.33	331.583	10955.7	265.799	11248.3	591.428		10771.7	362.368	13264	2093.69	12581.7	966.894		11573.3	321.969	13155.7	664.519	12408	329.771
171	170	0.17	-0.769551	-0.769551	9872	331.997	11183.3	265.808	11497.7	603.231		11020.7	368.887	13589.3	2140.06	12852.3	981.957		11833.7	345.095	13481	679.006	12722	360.169
181	180	0.18	-0.744727	-0.744727	10078	345.378	11400	278.716	11746.7	615.554		11270	377.556	13892.7	2201.29	13134	1012.55		12104.7	352.611	13806	679.006	13014.7	360.39
191	190	0.19	-0.721246	-0.721246	10283.7	371.812	11627.7	291.942	11963.7	617.18		11508.3	392.837	14185	2246.98	13394	1059.16		12375.3	360.39	14109	691.876	13307	383.252
201	200	0.2	-0.69897	-0.69897	10490	385.057	11833.7	291.898	12212.7	629.422		11736	393.03	14466.7	2301.49	13676	1088.56		12635.3	360.39	14434.3	706.794	13600	406.089
211	210	0.21	-0.677781	-0.677781	10695.7	398.042	12050.3	305.38	12440.3	629.485		11974.3	408.316	14759.7	2346.35	13935.7	1111.82		12884.7	375.465	14738	719.112	13892.7	406.338
221	220	0.22	-0.657577	-0.657577	10890.7	398.042	12256.3	305.467	12668.3	629.485		12180.7	401.857	15030.3	2385.24	14174.3	1149.83		13145	375.715	15030.3	745.535	14163.3	421.415
231	230	0.23	-0.638272	-0.638272	11086	424.578	12451.3	318.798	12895.7	655.821		12408	423.33	15301.7	2422.68	14423.7	1179.99		13394	391.262	15323	745.961	14434.3	436.964
241	240	0.24	-0.619789	-0.619789	11291.7	424.846	12657.3	319.088	13112.3	641.863		12635.3	423.057	15561.3	2468.85	14672.7	1211.09		13643.3	406.338	15615.7	761.581	14716	445.561
251	250	0.25	-0.60206	-0.60206	11476	451.523	12852	333.089	13318	655.761		12852.3	432.249	15832.3	2507.46	14900.3	1233.73		13871	406.089	15886.7	773.351	14976	467.592
261	260	0.26	-0.585027	-0.585027	11660	438.119	13036.3	346.321	13513	655.761		13047.3	432.249	16070.7	2545.65	15127.7	1256.76		14109	414.508	16168.7	787.554	15225.3	475.681
271	270	0.27	-0.568636	-0.568636	11855.3	464.648	13220.7	347.786	13730	668.19		13264	438.82	16330.7	2567.9	15355.3	1279.7		14337	414.508	16428.3	813.967	15474.7	484.105
281	280	0.28	-0.552842	-0.552842	12039.3	478.304	13405	361.056	13935.7	666.634		13480.3	447.691	16569.3	2606.68	15572	1310.34		14564.7	414.978	16710	828.146	15713.3	499.878
291	290	0.29	-0.537602	-0.537602	12213	491.184	13589	374.743	14120.3	667.812		13676	447.223	16797	2629.16	15789	1340.74		14803	421.638	16970	828.146	15962.3	506.748
301	300	0.3	-0.522879	-0.522879	12386	491.677	13762.3	375	14315.3	667.812		13860	453.573	17035.7	2667.26	15995	1356.29		15009	430.033	17219.7	853.011	16211.7	515.12
311	310	0.31	-0.508638	-0.508638	12581.3	491.258	13936	375.717	14499.3	680.366		14055.3	432.249	17263	2690.65	16200.7	1394.9		15225.3	445.091	17458	854.117	16417.3	530.161
321	320	0.32	-0.49485	-0.49485	12733	505.103	14109	376.527	14694.3	680.366		14250.3	457.181	17468.7	2705.73	16406.7	1410.46		15453.3	445.091	17718	880.91	16666.7	538.883
331	330	0.33	-0.481486	-0.481486	12917.3	504.419	14282.3	403.541	14878.3	682.115		14423.3	447.691	17696	2728.53	16591	1418.3		15648.3	445.091	17945.7	880.529	16883.7	548.006
341	340	0.34	-0.468521	-0.468521	13069	518.153	14445.3	403.541	15041.3	693.042		14597	462.673	17902	2744.09	16785.7	1441.59		15854	452.042	18173.3	907.282	17100.3	578.435
351	350	0.35	-0.455932	-0.455932	13231.3	518.174	14586.3	404.426	15214.3	680.366		14770.3	457.181	18097.3	2789.81	16970	1448.71		16060.3	460.62	18400.7	907.33	17317	585.068
361	360	0.36	-0.443697	-0.443697	13405	530.951	14759.7	405.762	15388	679.006		14943.3	447.691	18292.3	2789.81	17154.3	1479.56		16255.3	460.62	18639	919.559	17512	585.068
371	370	0.37	-0.431798	-0.431798	13556.7	544.675	14922	405.346	15561.3	693.042		15117	462.673	18487.7	2812.68	17317	1502.83		16439.3	476.151	18856	933.709	17717.7	600.092
381	380	0.38	-0.420216	-0.420216	13708.3	532.028	15063	406.358	15724	693.083		15290.7	456.889	18682.7	2835.52	17512	1502.83		16634.3	476.151	19061.7	946.008	17934.7	609.165
391	390	0.39	-0.408935	-0.408935	13870.7	558.508	15214.7	420.045	15876	679.006		15453	456.715	18866.7	2843.08	17674.7	1549		16807.7	482.895	19278.7	960.142	18119	618.209
401	400	0.4	-0.39794	-0.39794	14022.3	557.469	15355.7	421.115	16027.3	691.485		15605	462.673	19040	2858.41	17837	1549.9		16991.7	475.681	19484.3	972.462	18314	618.209
411	410	0.41	-0.387216	-0.387216	14163.7	558.508	15507	434.415	16190	680.414		15756.3	447.691	19213.3	2873.72	17988.7	1580.5		17176	490.743	19679.7	972.848	18498.7	648.607
421	420	0.42	-0.376751	-0.376751	14315.3	557.469	15648	435.542	16341.7	692.656		15897.3	441.797	19397.7	2881.11	18151.7	1580.5		17338.7	491.214	19885.3	985.246	18682.7	654.829
431	430	0.43	-0.366532	-0.366532	14456	558.088	15778	435.542	16482.7	691.453		16060	441.968	19571	2897.14	18314	1604.28		17533.7	491.214	20080.7	1011.69	18855.7	648.607
441	440	0.44	-0.356547	-0.356547	14597	571.179	15919	436.727	16634.3	693.042		16211.3	447.691	19733.7	2919.91	18455	1619.81		17696.7	491.214	20275.7	1011.69	19040	657.806
451	450	0.45	-0.346787	-0.346787	14727	571.179	16049.3	437.106	16775.3	680.366		16341.3	447.691	19896.3	2919.44	18617.3	1619.59		17858.7	491.214	20459.7	1025.73	19224.3	663.58
461	460	0.46	-0.337242	-0.337242	14868	572.007	16179.3	451.592	16905.3	680.366		16493.3	457.181	20048.3	2927.31	18747.7	1643.45		18010.7	506.748	20633.3	1038.17	19386.7	664.048
471	470	0.47	-0.327902	-0.327902	14998	584.002	16309.3	451.592	17035	691.876		16612.3	441.797	20210.7	2950.32	18899	1650.19		18173	506.277	20795.7	1037.74	19549.3	688.444
481	480	0.48	-0.318759	-0.318759	15128	572.007	16439.3	451.592	17176	679.006		16764.3	426.424	20362	2957.95	19040.3	1665.46		18335.7	506.748	20991	1038.13	19712	709.466
491	490	0.49	-0.309804	-0.309804	15258	584.002	16547.3	452.88	17306	679.006		16894.3	447.691	20514	2965.63	19181	1680.52		18498	506.277	21164.3	1051.06	19875	709.466
501	500	0.5	-0.30103	-0.30103	15377	597.723	16677.3	452.88	17436	679.006		17013.3	432.249	20644	2965.63	19311	1704.61		18639	513.526	21337.7	1063.61	20026.3	718.529
511	510	0.51	-0.29243	-0.29243	15517.7	598.502	16796.7	466.155	17566	679.006		17143.7	432.716	20795.7	2973.03	19441	1704.61		18780	521.813	21489.3	1077.13	20189	718.816
521	520	0.52	-0.283997	-0.283997	15626.7	584.599	16916	454.182	17685.3	691.485		17273.7	432.716	20936.3	2988.7	19571	1728.04		18932	513.526	21651.7	1077.53	20329.7	733.776
531	530	0.53	-0.275724	-0.275724	15756.7	584.599	17035	467.862	17804.7	692.656		17392.7	417.282	21066.3	2988.7	19701	1728.04		19073	521.813	21825	1105.07	20481.3	743.478
541	540	0.54	-0.267606	-0.267606	15864.7	597.705	17132.7	467.489	17924	679.006		17522.7	417.282	21207.3	3004.26	19809.7	1743.83		19213.7	528.852	21966	1091.07	20611.3	743.478
551	550	0.55	-0.259637	-0.259637	15973.3	598.472	17252	455.579	18054	679.006		17631.3	411.698	21338	3003.79	19929	1752.29		19343.7	528.852	22129	1102.76	20763	748.925
561	560	0.56	-0.251812	-0.251812	16092.7	597.705	17360.3	456.618	18173	691.876		17750.7	417.282	21457	3011.6	20059	1752.29		19484.3	513.772	22269.7	1103.6	20904	764.364
571	570	0.57	-0.244125	-0.244125	16200.7	598.502	17469	469.247	18281.3	678.968		17869.7	401.857	21576	3019.35	20156.3	1776.35		19614.3	513.772	22410.7	1116.6	21034	764.364
581	580	0.58	-0.236572	-0.236572	16330.7	598.502	17577.3	470.272	18389.7	666.634		17978	417.1	21706	3019.35	20275.7	1782.85		19744.3	536.879	22551.3	1129.26	21186	773.818
591	590	0.59	-0.229148	-0.229148	16428.7	598.502	17674.7	470.641	18487.7	666.634		18097.7	401.857	21825.3	3026.92	20394.7	1791.65		19874.7	536.458	22692.3	1142.38	21305.3	779.623
601	600	0.6	-0.221849	-0.221849	16525.7	598.502	17783	471.717	18607	679.006		18194.7	401.857	21944.7	3034.43	20503.3	1806.69		19993.7	528.852	22833.3	1143.11	21424.7	788.763
611	610	0.61	-0.21467	-0.21467	16634.3	611.112	17880.7	472.13	18704	679.006		18314	411.232	22063.7	3042.24	20600.3	1806.69		20123.7	528.852	22974	1155.78	21554.7	788.763
1021	1020	1.02	0.00860017	0.00860017	20600.3	570.781	21500	495.242	22497	465.137		22236.7	185.986	26171	3105.8	24437	2112.94		24664.3	544.158	27861.3	1407.58	25997.3	1103.81
1121	1120	1.12	0.049218	0.049218	20936.7	557.259	21781.7	499.543	22800.3	425.682		22573	155.72	26485.3	3113.86	24729.3	2137.39		25022.3	521.373	28251.7	1421.97	26322.3	1149.08
1221	1220	1.22	0.0863598	0.0863598	21207.7	570.781	22020.3	501.724	23038.7	398.337		22855	140.416	26756	3106.91	24978.7	2168.11		25325.7	528.852	28587.3	1435.41	26582.7	1174.02
1321	1320	1.32	0.120574	0.120574	21456.7	544.277	22237.3	514.984	23244.7	359.185		23082.3	115.762	26983.7	3130.41	25184.7	2183.56		25574.7	520.902	28847.7	1461.92	26788.3	1214.18
1421	1420	1.42	0.152288	0.152288	21652	544.695	22410.3	517.242	23418	331.997		23288	85.2174	27167.7	3138.89	25369	2192.59		25780.3	505.817	29064	1462.79	26940	1244.37
1521	1520	1.52	0.181844	0.181844	21825.3	531.607	22562	530.427	23580.7	305.463		23439.7	70.0539	27341	3155.75	25509.7	2207.57		25954	513.526	29248.7	1490.3	27081	1259.7
1621	1620	1.62	0.209515	0.209515	21966	519.065	22692.3	554.156	23700	292.306		23591.7	55.6317	27482	3171.27	25618.3	2198.54		26105.7	505.346	29411	1490.72	27189.7	1274.57
1721	1720	1.72	0.235528	0.235528	22096	519.065	22811.3	567.499	23830	265.361		23722	55.3052	27590.3	3210.01	25726.7	2213.72		26236.3	505.817	29552	1477.87	27287	1274.4
1821	1820	1.82	0.260071	0.260071	22204.3	506.705	22898	580.795	23938.7	252.41		23819.7	30.6413	27698.7	3225.27	25802.3	2228.7		26344.3	490.261	29660.3	1491.88	27363	1289.74
1921	1920	1.92	0.283301	0.283301	22313	520.441	23006.7	591.773	24047	252.009		23916.7	30.6413	27807.3	3264.51	25878	2219.77		26431	483.142	29768.7	1479.08	27428	1289.74
2021	2020	2.02	0.305351	0.305351	22399.7	506.662	23104	616.234	24133.7	225.479		24014.7	30.6413	27894	3295.08	25943.3	2241.38		26539.3	467.816	29866.3	1479.12	27482	1295.28
2121	2120	2.12	0.326336	0.326336	22475.3	520.392	23201.3	631.241	24242	225.895		24079.7	30.6413	27970	3334.09	25997.3	2225.9		26615	475.176	29953	1480.14	27547	1295.28
2221	2220	2.22	0.346353	0.346353	22562	506.277	23288	654.008	24339.3	225.479		24144.7	30.6413	28056.7	3364.65	26051.7	2234.76		26702	467.592	30040	1492.81	27601.3	1300.8
2321	2320	2.32	0.365488	0.365488	22638	520.441	23375	667.517	24437	225.895		24209.7	30.6413	28143.3	3395.22	26116.7	2234.76		26777.7	452.513	30115.7	1480.53	27666.3	1300.8
2421	2420	2.42	0.383815	0.383815	22724.7	506.662	23483.3	678.812	24545	212.289		24274.7	30.6413	28208.3	3463.47	26138.3	2241.38		26842.7	452.513	30202.3	1481.71	27720.7	1285.11
2521	2520	2.52	0.401401	0.401401	22790	506.277	23570	717.362	24643	212.289		24350.3	45.7262	28295	3494.04	26203.3	2241.38		26918.7	436.964	30267	1471.43	27785.7	1282.24
2621	2620	2.62	0.418301	0.418301	22865.7	520.01	23656.7	730.884	24751	225.895		24415.3	45.7262	28371	3533.01	26268.3	2241.38		27005.3	429.45	30365	1471.43	27850.7	1282.24
2721	2720	2.72	0.434569	0.434569	22941.3	518.675	23765	767.641	24859.7	225.88		24480.3	45.7262	28457.3	3585.52	26311.7	2256.58		27092	421.638	30451.3	1473.39	27937.7	1266.81
2821	2820	2.82	0.450249	0.450249	23017.3	532.73	23873.3	794.461	24968	239.233		24556.3	61.2826	28522.3	3631.42	26365.7	2241.1		27179	414.508	30549	1473.45	28002.3	1263.98
2921	2920	2.92	0.465383	0.465383	23093.3	531.607	23971	794.413	25098	239.233		24599.3	55.1745	28620	3677.53	26420.3	2247.8		27265.3	406.338	30635.7	1476.01	28089.3	1248.51
3021	3020	3.02	0.480007	0.480007	23158.3	531.607	24079.7	821.296	25206.3	239.316		24675.3	70.3626	28706.3	3730.14	26474.3	2256.86		27363	406.089	30722.3	1477.91	28175.7	1254.7
3121	3120	3.12	0.494155	0.494155	23245	544.695	24198.3	845.152	25336.3	266.211		24740.3	70.3626	28772	3776.27	26539.3	2256.86		27438.7	391.013	30841.7	1463.84	28273	1230.71
3221	3220	3.22	0.507856	0.507856	23331.7	557.469	24306.7	872.041	25466.7	265.79		24827	100.608	28869.3	3821.92	26604.3	2256.86		27547	398.985	30950	1468.81	28371	1230.71
3321	3320	3.32	0.521138	0.521138	23429	557.884	24415.3	883.874	25596.7	265.79		24892	100.608	28967	3868.05	26669.3	2278.11		27655.7	383.934	31047.3	1468.73	28479	1221.86
3421	3420	3.42	0.534026	0.534026	23494	557.884	24534.3	897.537	25715.7	279.769		24968	116.043	29064	3912.59	26723.7	2263.1		27753	362.089	31166.7	1471.13	28587.7	1213.42
3521	3520	3.52	0.546543	0.546543	23613.3	570.787	24643	924.826	25856.3	292.299		25054.7	122.565	29151	3965.68	26810	2271.87		27861.3	368.887	31286	1456.91	28706.7	1197.89
3621	3620	3.62	0.558709	0.558709	23689.3	570.781	24772.7	935.351	25986.3	292.299		25130.3	115.762	29259.3	4004.2	26864.3	2278.11		27970	353.843	31405.3	1459.69	28804	1198.36
3721	3720	3.72	0.570543	0.570543	23786.7	570.787	24892	948.617	26127.3	305.463		25217.3	146.051	29357	4050.35	26951	2287.35		28089	347.38	31524.7	1462.62	28923.3	1182.64
3821	3820	3.82	0.582063	0.582063	23895	583.795	25000.3	975.568	26268.3	306.242		25293.3	137.65	29454.3	4094.89	27016.3	2287.07		28208	338.332	31654.7	1462.62	29053.7	1182.37
3921	3920	3.92	0.593286	0.593286	23982	597.318	25119.3	989.253	26409.3	319.21		25369.3	153.206	29552	4141.05	27092	2302.08		28338.3	316.677	31795.3	1451.35	29172.7	1166.05
4021	4020	4.02	0.604226	0.604226	24079.3	611.112	25260.3	1001.62	26550.3	320.334		25456	183.848	29649.7	4187.21	27178.7	2308.82		28457.7	307.795	31925	1469.02	29302.7	1166.05
4121	4120	4.12	0.614897	0.614897	24187.7	597.705	25379.7	1014.89	26691	332.725		25542.3	191.836	29768.7	4216.68	27254.7	2302.36		28576.7	301.536	32055.3	1469.47	29432.7	1166.05
4221	4220	4.22	0.625312	0.625312	24285.3	624.231	25499.3	1028.21	26832	345.728		25629	199.404	29866.3	4239.97	27330.3	2317.37		28706.7	301.536	32207	1472.51	29562.7	1166.05
4321	4320	4.32	0.635484	0.635484	24393.7	625.393	25629	1043.17	26983.7	332.692		25726.7	198.933	29975	4277.93	27417	2326.65		28826	296.123	32337	1472.51	29693	1142.66
4421	4420	4.42	0.645422	0.645422	24502	638.001	25759	1043.17	27124.7	360.089		25824	222.416	30083.3	4339.19	27503.7	2332.58		28956	270.903	32467	1465.19	29844.3	1149.83
4521	4520	4.52	0.655138	0.655138	24610.3	638.507	25878.3	1056.44	27265.3	346.349		25910.7	230.045	30191.7	4353.77	27590.7	2341.66		29086	270.903	32629.7	1465.31	29974.3	1149.83
4621	4620	4.62	0.664642	0.664642	24718.7	651.473	26008.3	1056.44	27406.3	359.185		26008.3	229.574	30300	4415.04	27677	2350.52		29205	265.572	32770.3	1479.83	30104.3	1149.83
4721	4720	4.72	0.673942	0.673942	24827.3	652.537	26127.3	1070.13	27557.7	372.767		26094.7	214.489	30408	4430.59	27763.7	2357.13		29357	256.286	32922.3	1483.77	30245.3	1142.44
4821	4820	4.82	0.683047	0.683047	24935.3	665.385	26246.7	1083.41	27688	373.155		26192.3	237.734	30516.3	4468.23	27850.7	2366.27		29487.3	236.088	33074	1487.62	30397.3	1149.83
4921	4920	4.92	0.691965	0.691965	25055	679.006	26376.7	1083.41	27850.7	372.767		26279.3	245.13	30625	4484.02	27937.3	2372.14		29606.3	225.767	33204	1487.62	30527.3	1149.83
5021	5020	5.02	0.700704	0.700704	25152	679.006	26506.7	1083.41	27980.7	372.767		26387.3	260.687	30733.3	4521.71	28024.3	2381.27		29747.3	236.088	33356	1491.86	30657.3	1149.83
5121	5120	5.12	0.70927	0.70927	25260.7	680.366	26625.7	1097.1	28110.7	372.767		26485.3	260.687	30852.3	4552.81	28100	2396.27		29877.3	210.47	33507.7	1502.81	30809.3	1134.27
5221	5220	5.22	0.717671	0.717671	25369	693.083	26756	1111.69	28273.3	373.194		26582.3	260.687	30960.7	4590.54	28197.3	2396.74		30007.3	210.47	33659	1506.96	30950.3	1149.83
5321	5320	5.32	0.725912	0.725912	25477.3	694.205	26875.3	1099.71	28392.7	386.89		26691	275.772	31058.3	4613.62	28284	2405.46		30137	191.355	33811	1511.39	31080.3	1149.83
5421	5420	5.42	0.733999	0.733999	25585.3	706.794	26994.3	1113.4	28533.3	373.194		26789	275.772	31188.3	4636.74	28360	2420.92		30278	176.462	33951.7	1526.08	31210.3	1149.83
5521	5520	5.52	0.741939	0.741939	25704.7	720.559	27124.7	1112.98	28663.7	372.767		26875.3	283.615	31285.7	4659.66	28457.3	2420.64		30408	176.462	34092.7	1515.5	31340.3	1149.83
5621	5620	5.62	0.749736	0.749736	25813.3	706.794	27222	1113.02	28793.7	372.767		26983.7	298.938	31394.3	4674.75	28544.3	2429.88		30538	176.462	34244.3	1545.41	31481	1164.91
5721	5720	5.72	0.757396	0.757396	25921.3	719.499	27341.3	1101.07	28934.3	374.309		27081.3	299.156	31502.7	4712.56	28652.7	2445.05		30668	151.058	34396	1530.54	31632.3	1149.83
5821	5820	5.82	0.764923	0.764923	26030	720.94	27460.7	1114.34	29064.3	374.309		27178.7	298.938	31611	4727.89	28717.7	2445.05		30798	151.058	34548	1535.28	31741	1164.91
5921	5920	5.92	0.772322	0.772322	26138.7	733.185	27579.7	1128.02	29194.3	374.309		27276.3	321.498	31730.3	4758.76	28826	2460.32		30928.3	133.562	34688.7	1550.04	31882	1180.46
6021	6020	6.02	0.779596	0.779596	26257.7	747.356	27699	1116.09	29324.3	374.309		27395.7	306.413	31838.7	4774.08	28912.3	2469.32		31058.3	133.562	34819	1550.5	32023	1173.07
6121	6120	6.12	0.786751	0.786751	26365.7	733.185	27818.3	1129.35	29454.3	374.309		27482	314.227	31925.7	4781.77	28988.3	2484.77		31188.3	133.562	34970.3	1555.27	32142	1180.46
6221	6220	6.22	0.79379	0.79379	26485.3	746.974	27926.7	1105.2	29584.7	374.367		27579.7	314.48	32044.3	4812.41	29075.3	2490.95		31318.3	133.562	35111.3	1550.36	32283	1173.07
6321	6320	6.32	0.800717	0.800717	26582.7	747.356	28034.7	1117.44	29704	362.448		27688	329.771	32153	4827.49	29173	2515.2		31437.7	132.681	35252.3	1565.58	32391.3	1188.36
6421	6420	6.42	0.807535	0.807535	26691.3	759.63	28154	1130.7	29823	360.47		27774.7	337.526	32250.3	4827.96	29248.7	2506.23		31568	106.145	35393	1575.14	32532.3	1203.91
6521	6520	6.52	0.814248	0.814248	26799.3	772.391	28251.3	1130.74	29953	360.47		27883	329.771	32358.7	4865.86	29346	2530.66		31687	107.278	35534	1570.06	32651.3	1212.2
6621	6620	6.62	0.820858	0.820858	26897	772.003	28370.7	1118.87	30072	348.018		27969.7	337.526	32467	4881.18	29432.7	2539.5		31806	92.9982	35664	1590.43	32781.3	1212.2
6721	6720	6.72	0.827369	0.827369	27005.3	773.781	28457.3	1132.16	30191.3	336.191		28078.3	352.611	32564.7	4881.41	29519.7	2545.64		31936	92.9982	35805	1585.32	32900.7	1219.24
6821	6820	6.82	0.833784	0.833784	27113.7	786.039	28566	1133.55	30300	348.018		28164.7	337.526	32673	4896.73	29606.3	2554.47		32044.7	81.0692	35924	1590.43	33020	1227.27
6921	6920	6.92	0.840106	0.840106	27211.3	786.466	28685	1121.36	30419	335.825		28262.3	337.054	32781.3	4912.05	29682.3	2569.92		32152.7	70.0539	36075.7	1600.13	33128	1218.99
7021	7020	7.02	0.846337	0.846337	27330.7	800.168	28782.7	1121.32	30538	333.689		28371	352.139	32867.7	4919.58	29768.7	2578.99		32282.7	70.0539	36195	1605.72	33258	1242.81
7121	7120	7.12	0.85248	0.85248	27427.7	800.168	28890.7	1122.8	30646.3	336.191		28468.3	352.611	32976.7	4935.13	29855.7	2588.4		32402.3	76.8389	36325.3	1605.57	33388.3	1242.6
7221	7220	7.22	0.858537	0.858537	27525.7	800.168	28988.7	1122.8	30787.3	321.7		28566	352.139	33085.3	4950.22	29942	2594.24		32521.3	61.2826	36455.3	1605.57	33496.7	1257.88
7321	7320	7.32	0.864511	0.864511	27623.3	811.323	29086	1123.17	30885	322.138		28652.7	360.39	33161	4965.3	30028.7	2603.83		32640.7	70.0539	36574.3	1610.83	33605	1249.39
7421	7420	7.42	0.870404	0.870404	27731.3	812.497	29194.3	1124.27	30993.3	307.807		28761	352.139	33280	4973.1	30104.3	2618.79		32749.3	61.2826	36715	1625.69	33724.7	1257.88
7521	7520	7.52	0.876218	0.876218	27829	812.457	29292	1124.68	31112.7	321.767		28837	367.696	33377.7	4973.33	30191.3	2624.84		32857.3	55.1745	36845.3	1605.57	33832.7	1273.43
7621	7620	7.62	0.881955	0.881955	27926.3	812.497	29378.7	1112.53	31221	298.31		28945	360.169	33464.3	5003.98	30267	2643.2		32966	53.0723	36953.7	1620.56	33941	1266.04
7721	7720	7.72	0.887617	0.887617	28035	824.917	29476	1112.58	31318.3	298.661		29032	367.696	33561.7	5003.74	30354	2649.19		33085	66.9975	37083.7	1640.55	34049.3	1281.36
7821	7820	7.82	0.893207	0.893207	28132.3	825.307	29573.7	1112.53	31427	310.062		29129.3	368.167	33659.3	5003.98	30430	2664.62		33193	53.0723	37192.3	1635.4	34168.3	1288.5
7921	7920	7.92	0.898725	0.898725	28230	824.917	29671	1112.58	31535	295.494		29227	367.696	33756.7	5003.74	30516.3	2673.76		33290.7	45.7262	37322.3	1635.4	34277	1303.57
8021	8020	8.02	0.904174	0.904174	28327.3	825.307	29758	1100.51	31633	295.494		29313.7	375.936	33854	5026.89	30592.3	2667.83		33388.3	46.1976	37419.7	1655.88	34374.3	1304.04
8121	8120	8.12	0.909556	0.909556	28414	838.959	29855.7	1115.67	31741	281.031		29400	383.252	33952	5026.89	30668.3	2683.24		33507.7	61.2826	37560.3	1650.71	34483	1319.12
8221	8220	8.22	0.914872	0.914872	28511.7	838.92	29963.7	1102.05	31838.7	281.468		29487	367.696	34038.3	5034.38	30744	2698.19		33615.7	70.3626	37669	1665.56	34591	1311.96
8321	8320	8.32	0.920123	0.920123	28620	851.789	30050.7	1115.67	31957.7	269.353		29584.3	368.167	34125	5042.45	30820	2713.61		33713.3	70.0539	37777.7	1655.88	34678	1319.12
8421	8420	8.42	0.925312	0.925312	28717.7	851.755	30137.3	1103.61	32055.3	269.272		29671	375.715	34222.7	5041.98	30895.7	2728.57		33810.7	70.3626	37885.7	1671.22	34797	1327.49
8521	8520	8.52	0.93044	0.93044	28815	851.789	30234.7	1103.66	32142	257.957		29768.7	375.936	34309.3	5050.08	30993.3	2728.75		33919.3	81.0692	37994	1661.18	34894.7	1327.02
8621	8620	8.62	0.935507	0.935507	28891	864.708	30321.3	1091.64	32250.3	269.272		29855.7	382.78	34396	5058	31047.7	2738.07		34027.7	85.6829	38113.3	1670.75	34981.3	1334.44
8721	8720	8.72	0.940516	0.940516	28977.7	851.755	30408.3	1105.24	32337	257.957		29931.3	375.465	34482.7	5065.4	31145	2737.78		34114.3	81.0692	38221.3	1686.09	35089.7	1349.73
8821	8820	8.82	0.945469	0.945469	29075	851.789	30506	1090.42	32435	257.957		30029	375.715	34569.7	5073.09	31210	2737.78		34223	92.9982	38319.3	1686.09	35198.3	1342.78
8921	8920	8.92	0.950365	0.950365	29172.7	851.755	30581.7	1092.01	32532	257.957		30126.3	375.465	34667.3	5072.62	31275	2762.75		34320.3	93.3857	38449.3	1686.09	35295.7	1365.28
9021	9020	9.02	0.955207	0.955207	29248.3	864.286	30679	1092.06	32640.7	243.653		30191.3	375.465	34743	5065.16	31350.7	2777.69		34429	106.145	38514.3	1686.09	35393.3	1364.81
9121	9120	9.12	0.959995	0.959995	29346.3	864.286	30754.7	1093.67	32727	257.957		30289	375.715	34840.3	5088.17	31426.7	2793.1		34515.3	119.447	38644.3	1686.09	35490.7	1365.28
9221	9220	9.22	0.964731	0.964731	29432.7	877.818	30852.7	1093.67	32825	231.672		30365	367.696	34916.3	5080.48	31513.3	2798.51		34602	119.869	38741.7	1685.8	35599.3	1380.35
9321	9320	9.32	0.969416	0.969416	29519.7	877.318	30928.3	1080.49	32933	243.208		30451.3	375.465	35003.3	5088.17	31578.7	2802.68		34710.3	119.447	38828.3	1691.6	35696.3	1380.35
9421	9420	9.42	0.974051	0.974051	29628	877.851	31026	1080.13	33009	228.565		30549	375.715	35079	5080.72	31654.3	2817.62		34797	119.869	38947.7	1701.14	35761.3	1380.35
9521	9520	9.52	0.978637	0.978637	29704	890.787	31091	1080.13	33106.7	229.007		30614	375.715	35176.3	5080.48	31719.3	2817.62		34883.7	121.426	39045.3	1701.44	35870	1395.42
9621	9620	9.62	0.983175	0.983175	29801	890.787	31188.3	1080.49	33193.3	217.158		30701	383.252	35252.3	5096.04	31795.3	2833.02		34970.7	133.562	39142.7	1701.14	35967.3	1395.9
9721	9720	9.72	0.987666	0.987666	29877	891.861	31264.3	1082.18	33290.7	217.258		30776.7	375.936	35339	5080.72	31881.7	2842.35		35067.7	133.562	39240.3	1701.44	36043	1410.97
9821	9820	9.82	0.992111	0.992111	29964	890.787	31340.3	1068.61	33366.7	229.007		30863	383.252	35425.3	5088.17	31946.7	2842.35		35165.7	133.562	39327	1706.5	36141	1410.97
9921	9920	9.92	0.996512	0.996512	30050.7	904.699	31437.3	1068.61	33453.3	217.158		30950	391.262	35501.3	5080.48	32022.7	2857.74		35273.7	147.967	39414	1716.32	36238	1410.97
10021	10020	10.02	1.00087	1.00087	30148	904.731	31502.3	1068.61	33550.7	217.258		31026	383.252	35577	5073.06	32088	2857.45		35349.7	146.347	39511	1716.32	36336	1410.97
10121	10120	10.12	1.00518	1.00518	30213	904.731	31589.3	1056.77	33637.7	214.489		31101.7	375.936	35653	5088.62	32163.7	2872.38		35436.7	147.967	39609	1716.32	36422.7	1418.55
10221	10220	10.22	1.00945	1.00945	30310.7	904.699	31676	1070.28	33713.3	217.158		31177.3	391.013	35729	5080.72	32217.7	2882.03		35523	151.058	39684.7	1731.21	36509.3	1426.29
10321	10320	10.32	1.01368	1.01368	30386.3	917.263	31752	1056.71	33811	200.506		31264	375.715	35816	5088.62	32293.7	2897.42		35610	162.495	39782	1731.67	36607	1426.51
10421	10420	10.42	1.01787	1.01787	30473	904.731	31827.7	1043.57	33897.7	214.489		31329.3	375.465	35891.7	5080.96	32369.7	2891.73		35707.3	162.138	39868.7	1736.78	36682.7	1441.59
10521	10520	10.52	1.02202	1.02202	30549	917.684	31914.3	1056.77	33984.3	202.941		31427	375.715	35956.7	5080.96	32445.3	2906.64		35783.3	176.911	39966.7	1736.78	36758.7	1433.38
10621	10620	10.62	1.02612	1.02612	30646.3	917.263	31990.3	1043.21	34060.3	214.927		31492	375.715	36032.7	5073.3	32499.7	2916.09		35881	176.462	40063.7	1736.78	36867	1448.71
10721	10720	10.72	1.03019	1.03019	30711.3	917.263	32055.7	1043.57	34147	202.851		31557	375.715	36108.7	5065.4	32575.7	2931.46		35957	191.355	40150.7	1746.56	36953.7	1457.14
10821	10820	10.82	1.03423	1.03423	30798.3	931.192	32142	1041.88	34233.3	200.56		31643.7	382.78	36195	5073.06	32640.7	2931.46		36043.3	176.911	40226.7	1736.78	37029.7	1448.93
10921	10920	10.92	1.03822	1.03822	30874.3	917.263	32217.7	1043.57	34309.7	202.495		31719.3	375.465	36260	5073.06	32705.7	2931.46		36130	180.468	40313	1746.27	37116	1456.17
11021	11020	11.02	1.04218	1.04218	30950.3	918.301	32293.7	1030.01	34407	202.851		31784.3	375.465	36325	5073.06	32770.7	2931.46		36206	195.675	40410.7	1746.56	37203	1464.26
11121	11120	11.12	1.0461	1.0461	31026	930.8	32358.7	1030.01	34472	202.851		31871.3	383.934	36401	5065.44	32846.7	2946.84		36292.7	205.89	40497.3	1756.6	37289.7	1448.93
11221	11220	11.22	1.04999	1.04999	31112.3	918.301	32445.3	1018.66	34558.7	200.127		31947	375.715	36477	5057.51	32911.7	2946.84		36379.3	210.778	40573.3	1746.73	37365.3	1464.01
11321	11320	11.32	1.05385	1.05385	31188.3	931.192	32510.3	1018.66	34645.3	188.302		32012	375.715	36552.7	5050.12	32976.3	2971.51		36476.7	210.47	40659.7	1752.15	37463	1464.26
11421	11420	11.42	1.05767	1.05767	31264	943.768	32597.3	1016.87	34710.3	188.302		32077	375.715	36617.7	5050.12	33041.3	2971.51		36552.7	205.89	40746.7	1761.92	37539	1456.17
11521	11520	11.52	1.06145	1.06145	31340	944.782	32651.3	1005.12	34797.3	186.384		32152.7	368.887	36693.3	5042.42	33106.3	2971.51		36628.7	220.958	40811.7	1761.92	37614.7	1471.26
11621	11620	11.62	1.06521	1.06521	31427	943.768	32727.3	1016.87	34883.7	200.127		32228.7	360.39	36758.3	5042.42	33182.3	2965.97		36704.3	210.778	40876.7	1761.92	37701.3	1479.09
11721	11720	11.72	1.06893	1.06893	31481.3	931.192	32792	992.001	34948.7	174.196		32293.7	360.39	36823.3	5042.42	33236.7	2996.38		36791	221.415	40974.3	1761.46	37788	1487.28
11821	11820	11.82	1.07262	1.07262	31557	943.768	32868	993.829	35013.7	200.127		32358.7	360.39	36888.3	5042.42	33290.7	2981.02		36856	221.415	41039.3	1761.46	37864	1479.81
11921	11920	11.92	1.07628	1.07628	31643.3	931.192	32955	992.001	35100.3	199.368		32434.7	353.373	36964.3	5034.8	33366.7	2996.38		36942.7	225.767	41115.3	1776.82	37950.7	1486.81
12021	12020	12.02	1.0799	1.0799	31708.3	931.192	33020	992.001	35187.3	186.384		32499.7	353.373	37029.3	5034.8	33420.7	3006.23		37007.7	225.767	41212.3	1776.82	38015.7	1486.81
12121	12120	12.12	1.0835	1.0835	31773.3	931.192	33085	976.662	35252.3	186.384		32575.7	368.887	37094.3	5034.8	33496.3	3021.11		37094.7	236.088	41277.3	1776.82	38102.7	1494.41
12221	12220	12.22	1.08707	1.08707	31849.3	944.163	33161	978.477	35317.3	186.384		32640.7	368.887	37148.7	5019.72	33561.3	3021.11		37159.7	236.088	41342.3	1776.82	38178.7	1486.81
12321	12320	12.32	1.09061	1.09061	31925.3	945.172	33236.7	965.368	35382.3	186.384		32705.3	345.095	37224.3	5012.37	33605	3015.83		37246.3	240.633	41429.3	1782.45	38254.3	1501.89
12421	12420	12.42	1.09412	1.09412	31990.3	945.172	33279.7	951.855	35480	186.81		32770.7	344.844	37278.7	4997.29	33680.7	3030.7		37311.3	240.633	41505.3	1776.82	38330	1494.18
12521	12520	12.52	1.0976	1.0976	32066	957.687	33366.7	965.368	35534	186.161		32835.7	344.844	37343.7	4997.29	33745.7	3030.7		37398.3	250.81	41570.3	1776.82	38406	1509.73
12621	12620	12.62	1.10106	1.10106	32141.7	958.774	33420.7	953.718	35610	186.81		32900.7	344.844	37419.7	4989.31	33810.7	3030.7		37463.3	250.81	41646	1791.72	38492.3	1517.45
12721	12720	12.72	1.10449	1.10449	32206.7	958.774	33485.7	963.541	35685.7	199.386		32955	329.771	37474	4997.06	33865	3040.33		37528.3	250.81	41711	1791.72	38568.3	1509.49
12821	12820	12.82	1.10789	1.10789	32272	958.349	33550.7	938.347	35740.3	186.384		33030.7	344.844	37528	4981.5	33919.3	3045.58		37604	265.572	41786.7	1786.36	38633.3	1509.49
12921	12920	12.92	1.11126	1.11126	32337	958.349	33615.7	938.347	35826.7	185.753		33085	329.771	37593.3	4958.44	33984.3	3045.58		37668.7	261.799	41852	1786.82	38709.3	1525.05
13021	13020	13.02	1.11461	1.11461	32402.3	958.386	33681	938.7	35891.7	185.753		33139	338.332	37647.7	4966.18	34049.3	3045.58		37734	265.572	41917	1786.82	38785	1517.45
13121	13120	13.12	1.11793	1.11793	32467.3	958.386	33756.7	925.608	35956.7	185.753		33215	329.771	37734	4951.09	34103.3	3055.5		37820.7	271.197	41992.7	1801.7	38871.7	1524.82
13221	13220	13.22	1.12123	1.12123	32532.3	958.386	33800	927.086	36021.7	185.753		33280	329.771	37766.7	4950.62	34168.7	3055.97		37885.7	271.197	42068.7	1791.89	38936.7	1524.82
13321	13320	13.32	1.1245	1.1245	32597.3	958.386	33865	912.17	36086.7	185.753		33334	314.227	37831.7	4950.62	34233.7	3080.49		37961.3	286.125	42133.7	1791.89	39001.7	1524.82
13421	13420	13.42	1.12775	1.12775	32673	944.782	33930	912.17	36151.7	185.753		33399	314.227	37896.7	4928.23	34277.3	3070.83		38026.7	286.592	42209.7	1807.26	39077.7	1540.37
13521	13520	13.52	1.13098	1.13098	32727.3	958.386	33995	912.17	36216.7	185.753		33464	314.227	37940	4919.99	34331.3	3080.8		38091.7	286.592	42263.7	1791.89	39142.7	1540.37
13621	13620	13.62	1.13418	1.13418	32792.3	958.386	34060.3	887.478	36281.7	185.753		33496.7	314.48	38005	4919.99	34396.3	3080.8		38167.3	301.536	42318	1801.54	39218.7	1532.54
13721	13720	13.72	1.13735	1.13735	32857.3	958.386	34114.7	885.609	36346.7	200.56		33561.7	314.48	38059.3	4904.9	34461.3	3080.8		38221.7	286.592	42394	1816.89	39294.7	1548.09
13821	13820	13.82	1.14051	1.14051	32922.7	958.774	34168.7	883.708	36400.7	186.384		33626.7	314.48	38102.3	4897.36	34504.7	3095.82		38297.3	301.536	42459	1816.89	39359.7	1548.09
13921	13920	13.92	1.14364	1.14364	32987.7	958.774	34244.7	885.609	36465.7	186.384		33681	299.409	38167.3	4897.36	34558.7	3105.81		38362.3	301.536	42513	1801.54	39424.7	1548.09
15321	15320	15.32	1.18526	1.18526	33897.7	958.774	35089.7	790.682	37365.7	205.89		34537.3	245.13	38980.3	4760.1	35404	3134.99		39337.7	346.911	43456	1826.64	40454	1601.65
16321	16320	16.32	1.21272	1.21272	34374.3	961.708	35545	735.794	37842.3	210.778		34992	199.404	39414	4661.02	35870	3175.72		39868.7	360.39	43954.3	1841.81	41017.7	1616.74
17321	17320	17.32	1.23855	1.23855	34818.7	975.55	35967.3	656.842	38286.7	241.098		35404	161.749	39804	4569.13	36281.7	3190.56		40356.3	383.934	44398.7	1851.45	41537.7	1662.7
18321	18320	18.32	1.26293	1.26293	35230.3	963.566	36336	613.411	38677	237.947		35772.7	107.009	40150.7	4484.97	36682.7	3185.67		40801	414.508	44799.7	1846.17	42003.7	1678.25
19321	19320	19.32	1.28601	1.28601	35588.3	963.566	36661	558.472	39002	260.215		36086.7	70.0539	40465	4401.09	37040.3	3191.42		41180	421.638	45168	1861.17	42415.3	1708.89
20321	20320	20.32	1.30792	1.30792	35902.7	951.614	36954	519.472	39283.7	268.547		36379.3	26.5372	40746.7	4317.73	37333.3	3191.42		41548.3	436.964	45482.3	1871.1	42794.7	1716.38
21321	21320	21.32	1.32879	1.32879	36173.3	953.797	37203	478.041	39576.3	292.299		36639.3	26.5372	40985	4241.21	37625.7	3196.92		41874	459.619	45764	1855.97	43120	1739.53
22321	22320	22.32	1.34869	1.34869	36433.3	953.797	37452.3	437.038	39825.3	301.536		36888.3	40.7131	41212.7	4172.78	37907.3	3207.63		42155.3	467.345	46024	1855.97	43434.3	1770.41
23321	23320	23.32	1.36773	1.36773	36661	953.43	37669	396.241	40009.7	310.975		37084	85.2174	41429	4133.82	38124	3192.79		42426.3	482.895	46252	1855.97	43705	1785.5
24321	24320	24.32	1.38596	1.38596	36867.3	929.744	37853.3	354.841	40226.7	321.161		37268	107.278	41603	4058.72	38351.7	3192.33		42675.7	490.261	46457.7	1851.04	43965	1785.5
25321	25320	25.32	1.40346	1.40346	37051.3	944.375	38016	339.677	40389	346.557		37420	140.416	41776.3	4028.11	38536	3177.64		42892.3	498.446	46663.7	1846.08	44192.7	1808.31
26321	26320	26.32	1.42029	1.42029	37213.7	943.931	38178.3	302.06	40562.3	342.069		37582.3	165.653	41928	3966.9	38731	3183.63		43098	513.526	46837.3	1836.09	44409.7	1816.14
27321	27320	27.32	1.43648	1.43648	37376	935.537	38308.3	286.532	40703.3	357.068		37734	180.468	42068.7	3936.09	38883	3194.36		43293.3	513.301	46999.7	1841.23	44583	1831.45
28321	28320	28.32	1.45209	1.45209	37506.3	935.888	38460.3	268.632	40855	367.789		37842.3	210.47	42198.7	3914.18	39034.3	3179.71		43466.7	528.606	47140.3	1831.15	44778	1831.45
29321	29320	29.32	1.46716	1.46716	37647.3	939.193	38579	243.772	40985.3	368.24		37961.3	225.767	42307	3883.58	39175.3	3175.39		43629.3	528.852	47292	1816.07	44951.3	1846.78
30321	30320	30.32	1.48173	1.48173	37777.3	939.193	38687.7	216.264	41093.7	391.123		38059	225.607	42437	3861.05	39305.3	3175.39		43792	551.543	47411.3	1820.84	45092	1839.38
31321	31320	31.32	1.49582	1.49582	37874.7	938.743	38807	213.274	41201.7	379.369		38156.7	250.81	42534.7	3838.78	39435.3	3175.39		43943.3	536.458	47541.3	1820.84	45255	1839.38
32321	32320	32.32	1.50947	1.50947	37983	942.631	38904.3	197.901	41310	402.768		38265	256.286	42621.3	3821.92	39543.7	3170.82		44084.3	552.015	47650	1816.07	45385	1839.38
33321	33320	33.32	1.5227	1.5227	38091.7	946.08	38991	188.772	41429.3	405.346		38351.7	271.37	42729.7	3815.4	39652.3	3160.3		44214.3	552.015	47747.7	1811.06	45525.7	1854.46
34321	34320	34.32	1.53555	1.53555	38189	920.36	39088.7	173.808	41505.3	402.696		38427.7	281.295	42816.7	3799.87	39749.7	3166.64		44344.3	552.015	47866.7	1795.79	45645	1839.38
35321	35320	35.32	1.54802	1.54802	38276	935.392	39142.7	150.947	41613.3	417.23		38503.3	286.592	42903	3808.2	39847	3185.77		44474.3	552.015	47953	1780.99	45775	1862.23
36321	36320	36.32	1.56015	1.56015	38362.7	943.893	39229.3	132.599	41678.7	427.033		38579	296.123	42990	3792.67	39933.7	3170.82		44593.3	536.458	48072.3	1785.92	45894.3	1847.15
37321	37320	37.32	1.57194	1.57194	38438.7	928.742	39294.3	132.599	41765.3	439.732		38644	296.123	43076.3	3777.61	40031.3	3171.15		44702	551.543	48170.3	1785.92	45991.7	1846.92
38321	38320	38.32	1.58343	1.58343	38535.7	928.742	39381	128.718	41852	452.138		38709	296.123	43152.3	3793.14	40118.3	3181.83		44810.7	566.628	48235.3	1785.92	46111	1854.79
39321	39320	39.32	1.59461	1.59461	38600.7	928.742	39467.7	125.53	41928	439.305		38774	296.123	43228.3	3786.25	40183.3	3181.83		44908	567.1	48332.7	1780.94	46219.3	1847.15
40321	40320	40.32	1.60552	1.60552	38687.7	943.893	39544	114.135	42004	453.45		38850.3	305.959	43304	3801.3	40259.3	3177.7		45006	567.1	48408.3	1775.81	46317	1848.15
41321	41320	41.32	1.61616	1.61616	38763.3	922.807	39598	110.479	42090.3	439.732		38926	291.254	43369	3801.3	40345.7	3181.7		45125	551.543	48495	1760.81	46414.3	1847.93
42321	42320	42.32	1.62655	1.62655	38817.3	938.05	39684.3	107.054	42155.3	439.732		38969.3	295.659	43445	3816.82	40410.7	3181.7		45201	567.1	48582	1766.08	46501	1831.84
43321	43320	43.32	1.63669	1.63669	38893.3	943.122	39749.3	107.054	42220.3	439.732		39034.3	321.161	43521	3834.16	40486.3	3177.7		45298	567.1	48657.7	1756.43	46598.7	1832.85
44321	44320	44.32	1.6466	1.6466	38969.3	953.303	39814.7	112.934	42296.3	427.084		39088.3	310.975	43596.7	3849.2	40562.3	3192.75		45396	567.1	48755	1756.13	46706.7	1824.64
45321	45320	45.32	1.65629	1.65629	39023.7	943.428	39890.7	100.512	42361.3	453.88		39153.3	310.975	43640	3864.51	40627.3	3192.75		45482.3	552.015	48820	1756.13	46793.7	1832.85
46321	46320	46.32	1.66577	1.66577	39088.7	943.428	39944.7	97.4331	42437.3	441.363		39197	296.123	43727	3871.32	40692.3	3192.75		45569	559.484	48907	1761.62	46880.3	1817.53
47321	47320	47.32	1.67504	1.67504	39153.7	943.428	40009.7	97.4331	42513	455.29		39251.3	310.975	43791.7	3895.07	40725	3192.29		45645	551.543	48972	1761.62	46967	1802.23
48321	48320	48.32	1.68413	1.68413	39218.7	943.428	40074.7	97.4331	42578	455.29		39305.3	305.959	43846	3903.55	40801	3207.34		45742.3	552.015	49058.7	1742.46	47064.7	1801.76
49321	49320	49.32	1.69302	1.69302	39283.3	938.7	40140	104.984	42643	455.29		39370.3	305.959	43943.3	3925.64	40866	3207.34		45818.3	544.403	49145.3	1751.69	47151.3	1810.29
50321	50320	50.32	1.70174	1.70174	39337.7	953.604	40205	104.984	42719	469.726		39413.7	290.931	43987	3940.68	40931	3207.34		45905	551.543	49221.3	1767.06	47238.3	1794.75
51321	51320	51.32	1.71029	1.71029	39403	953.775	40259	102.688	42773	482.001		39457	296.123	44062.7	3979.97	40985	3218.29		45970	529.077	49297	1757.68	47314	1787.85
52321	52320	52.32	1.71867	1.71867	39446.3	938.7	40324	102.688	42859.7	483.792		39522	296.123	44116.7	3986.77	41039	3222.4		46045.7	544.158	49373	1773.08	47400.3	1794.75
53321	53320	53.32	1.72689	1.72689	39511.3	959.802	40378.3	100.668	42935.7	498.359		39565.3	305.959	44192.7	4025.78	41093.7	3232.87		46121.3	536.458	49449	1763.51	47476.7	1764.14
54321	54320	54.32	1.73496	1.73496	39565.3	954.07	40454	112.028	42979	512.9		39619.7	295.964	44258	4047.9	41158.7	3232.87		46186.7	536.879	49535.3	1769.27	47573.7	1764.14
55321	55320	55.32	1.74288	1.74288	39630.3	954.07	40508.3	125.223	43055	501.141		39674	291.254	44322.7	4071.66	41190.7	3232.87		46262.7	528.606	49600.3	1769.27	47639	1741.97
56321	56320	56.32	1.75066	1.75066	39684.3	944.398	40551.3	137.412	43098.3	515.817		39717	296.123	44387.7	4093.99	41255.7	3232.87		46338.7	544.158	49687.3	1775.32	47725.7	1748.6
57321	57320	57.32	1.75831	1.75831	39738.7	959.335	40616.3	137.412	43174	530.182		39760.7	281.295	44463.7	4132.99	41321	3251.94		46392.7	528.606	49752.3	1775.32	47801.7	1742.18
58321	58320	58.32	1.76582	1.76582	39771.7	959.335	40660	149.486	43239	530.182		39804	286.302	44518	4163.82	41364.7	3247.92		46457.7	505.817	49828	1790.3	47866.7	1742.18
59321	59320	59.32	1.7732	1.7732	39836.7	959.335	40736	162.138	43282.3	544.692		39858	280.832	44593.7	4201.23	41429.7	3247.92		46544.3	513.301	49914.7	1796.76	47953.3	1726.91
60321	60320	60.32	1.78046	1.78046	39890.7	949.848	40790	161.239	43358.3	559.587		39890.7	281.295	44658.7	4224.69	41483.7	3258.88		46609.7	513.772	49990.7	1787.58	48029	1720.13
61321	61320	61.32	1.7876	1.7876	39944.7	965.283	40844.3	160.522	43412.7	563.292		39955.7	281.295	44713	4255.52	41526.7	3247.92		46653	506.277	50044.7	1796.76	48116	1704.61
62321	62320	62.32	1.79463	1.79463	39998.7	959.335	40898.3	174.217	43488.3	577.873		39988	280.832	44789	4292.69	41581	3251.94		46717.7	505.817	50131.3	1802.58	48159	1696.05
63321	63320	63.32	1.80154	1.80154	40053	950.133	40952.7	187.5	43543	589.026		40053	261.641	44864.7	4331.92	41635.3	3262.51		46793.7	498.221	50207.3	1818.06	48256.7	1696.31
64321	64320	64.32	1.80835	1.80835	40107.3	965.1	41017.3	199.615	43597	593.065		40096.7	266.034	44919	4362.02	41679	3258.54		46858.7	498.221	50283.3	1808.99	48321.7	1697.95
65321	65320	65.32	1.81505	1.81505	40150.7	949.848	41071.3	213.27	43651	622.679		40128.7	266.034	44983.7	4408.11	41743.7	3277.24		46902.3	491.214	50348	1833.06	48386.7	1673.82
66321	66320	66.32	1.82164	1.82164	40194	956.261	41115	226.064	43727	637.811		40172.3	251.271	45038.3	4438.69	41787	3273.58		46956.3	498.446	50424	1824	48452	1650.19
67321	67320	67.32	1.82814	1.82814	40248.3	971.254	41191	239.316	43770.3	652.642		40226.7	266.034	45103	4484.79	41830.7	3288.17		47010.3	482.895	50500	1839.49	48538.3	1658.5
68321	68320	68.32	1.83455	1.83455	40291.3	955.792	41245	252.933	43846	667.354		40269.7	250.81	45179	4523.75	41895.7	3288.17		47075.3	482.895	50575.7	1830.8	48603.7	1636.62
69321	69320	69.32	1.84086	1.84086	40345.3	971.254	41288.3	265.799	43900.3	672.016		40302.7	250.81	45233	4554.12	41938.7	3284.11		47129.7	467.816	50662.3	1861.33	48679.7	1627.92
70321	70320	70.32	1.84708	1.84708	40378.3	971.254	41364.3	293.019	43954.3	702.543		40356.7	240.633	45298.3	4600.42	41971.3	3284.23		47183.7	476.151	50727.3	1861.33	48744.7	1627.92
71321	71320	71.32	1.85321	1.85321	40443.3	971.254	41397	305.635	44008.7	707.626		40389	240.933	45352.3	4630.79	42036.3	3284.23		47237.7	460.62	50792.3	1861.33	48809.3	1605.79
72321	72320	72.32	1.85926	1.85926	40486.3	955.792	41462	305.635	44063	717.362		40443.3	236.088	45417.3	4676.62	42079.7	3299.14		47303	459.619	50879.3	1867.98	48863.7	1590.75
73321	73320	73.32	1.86522	1.86522	40529.7	962.406	41516.3	332.703	44127.7	737.546		40486.3	220.958	45482.3	4722.51	42133.7	3284.11		47367.7	460.62	50955	1883.02	48939.3	1582.3
74321	74320	74.32	1.87111	1.87111	40573.3	971.254	41570.3	332.385	44203.7	752.902		40530	225.607	45547.7	4746.42	42188	3294.79		47411.3	452.513	51031	1898.53	49004.3	1559.99
75321	75320	75.32	1.87691	1.87691	40616.7	977.89	41635	358.889	44236.3	777.67		40573.3	210.47	45612.3	4792.52	42231.3	3284.23		47454.7	445.091	51096	1898.53	49069.3	1559.99
76321	76320	76.32	1.88264	1.88264	40670.7	971.533	41678.7	371.825	44301	798.084		40616.3	220.958	45655.7	4829.51	42274.7	3299.14		47519.7	445.091	51171.7	1913.57	49123.7	1544.95
77321	77320	77.32	1.88829	1.88829	40703.3	971.254	41732.7	385.398	44366.3	819.136		40649.3	220.958	45710	4860.35	42339.3	3280.23		47552	445.561	51226	1920.14	49199.7	1536.21
78321	78320	78.32	1.89387	1.89387	40746.7	977.89	41798	411.904	44420.3	828.687		40692.3	205.89	45775	4883.77	42383	3294.79		47606.3	429.823	51323.3	1944.12	49275.3	1529.65
79321	79320	79.32	1.89938	1.89938	40789.7	962.406	41863	411.904	44474.3	834.564		40746.7	195.527	45839.7	4929.87	42437.3	3280.23		47671.7	429.563	51377.7	1950.71	49329.3	1514.14
80321	80320	80.32	1.90482	1.90482	40844.3	977.617	41906.3	438.655	44528.7	864.497		40779	195.675	45894.3	4960.45	42480.3	3295.24		47726	414.508	51453.3	1942.34	49383.7	1499.1
81321	81320	81.32	1.9102	1.9102	40876.7	977.89	41971	465.16	44593.7	886.15		40811.7	195.527	45948.3	5013.27	42534.3	3280.23		47758	414.508	51518.7	1966.23	49448.7	1499.1
82321	82320	82.32	1.91551	1.91551	40909.3	977.617	42014.3	478.087	44647.7	895.383		40855	180.468	46013.3	5036.66	42567	3305.84		47823	414.508	51594.3	1957.86	49502.7	1483.59
83321	83320	83.32	1.92075	1.92075	40974.3	977.617	42079.7	504.597	44702	923.384		40898	191.355	46067.7	5067.5	42643.3	3276.31		47856	414.508	51670	1972.92	49568	1461.97
84321	84320	84.32	1.92593	1.92593	41006.7	977.89	42133.7	518.167	44756.3	932.107		40941.7	176.911	46122	5098.29	42686.3	3291.3		47910	398.985	51735.3	1996.8	49632.7	1437.82
85321	85320	85.32	1.93105	1.93105	41039.3	977.617	42188	531.333	44810.3	962.406		40985	180.468	46165	5135.61	42729.7	3287.08		47964	407.846	51800.7	1994.98	49687.3	1446.94
86321	86320	86.32	1.93611	1.93611	41093.7	968.948	42242	544.917	44864.3	968.948		41028.3	165.653	46219.3	5168.07	42773.3	3276.31		48007.3	377.365	51876.3	2012.33	49763	1416.24
87321	87320	87.32	1.94111	1.94111	41136.7	977.89	42307.3	571.416	44930	992.908		41060.7	165.784	46273.7	5198.18	42827.3	3287.42		48050.7	392.561	51941.3	2034.1	49828	1416.24
88321	88320	88.32	1.94606	1.94606	41169.3	977.617	42361.3	585.002	44973.3	1006.06		41093.3	165.653	46338.7	5220.63	42892.3	3287.42		48094.3	383.934	52006.3	2034.1	49871.3	1385.74
89321	89320	89.32	1.95095	1.95095	41212.7	984.453	42404.7	611.78	45038	1029.83		41136.7	150.723	46382	5259.34	42925	3268.77		48159.3	383.934	52071.3	2034.1	49936.7	1385.46
90321	90320	90.32	1.95578	1.95578	41245	983.983	42448.3	624.684	45092	1036.64		41169	151.058	46403.7	5289.92	42968	3283.73		48191.7	362.368	52147.3	2049.62	49991	1370.45
101621	101620	101.62	2.00698	2.00698	41711	990.745	43076.3	838.933	45688.3	1234.31		41613.7	95.451	46913	5528.33	43531.7	3217.36		48711.7	316.677	52862.3	2141.4	50651.7	1202.59
111621	111620	111.62	2.04774	2.04774	42079.3	975.487	43575	1027.6	46165	1356.29		41949.7	55.1745	47281.3	5658.79	44008.7	3174.65		49145.3	266.034	53426	2202.33	51160.7	1079.05
121621	121620	121.62	2.085	2.085	42426.3	966.894	44019.3	1216.75	46576.7	1457.14		42285.3	15.0849	47574	5704.9	44420.3	3107.9		49535.3	216.358	53892	2219.48	51637.7	993.829
131621	131620	131.62	2.11932	2.11932	42762.3	997.961	44409.7	1339.9	46967.3	1503.77		42589	0	47823.3	5713.26	44821.3	3044.78		49892.7	170.604	54325.3	2234.74	52092.7	903.213
141621	141620	141.62	2.15112	2.15112	43076.7	989.093	44734.7	1449.33	47303	1544.69		42860	15.5563	48039.7	5675.82	45168.3	2996.51		50240	155.72	54672.3	2243.41	52515.7	837.68
151621	151620	151.62	2.18076	2.18076	43336.7	989.093	45005.3	1545.61	47617.3	1555.79		43098.7	30.6413	48235.3	5630.2	45450	2949.35		50532.7	131.038	54965	2221.35	52873.3	792.987
161621	161620	161.62	2.2085	2.2085	43564	965.565	45233	1614.58	47845	1558.96		43315.3	61.2826	48387	5569.06	45699	2902.59		50792.7	107.009	55214	2205.84	53176.7	763.107
171621	171620	171.62	2.23457	2.23457	43770.3	973.308	45406.3	1670.33	48061.3	1522.53		43499.3	70.3626	48527.7	5516.64	45915.7	2898.95		51052.7	107.009	55409.3	2184.15	53458	767.641
181621	181620	181.62	2.25916	2.25916	43954.7	966.037	45569	1710.65	48257	1526.46		43662	106.145	48657.7	5446.53	46078.3	2883.05		51237	91.9239	55582.7	2153.62	53664.3	763.428
191621	191620	191.62	2.28244	2.28244	44106	981.116	45677.7	1726.15	48408.3	1490.58		43791.7	132.681	48766.3	5394.14	46208.3	2883.05		51399	91.9239	55712.7	2153.62	53881	793.306
201621	201620	201.62	2.30453	2.30453	44236.3	958.477	45786	1753.17	48549	1485.3		43911	145.952	48863.7	5348.07	46316.7	2855.06		51551	100.608	55821	2123.1	54022	807.718
211621	211620	211.62	2.32556	2.32556	44355.3	951.362	45861.7	1754.07	48668.7	1449.55		43997.3	186.384	48950.3	5286.96	46414.3	2839.41		51670.3	110.479	55918.3	2077.08	54163	822.923
221621	221620	221.62	2.34561	2.34561	44442	944.919	45937.7	1781.51	48755	1434.72		44084.3	200.56	49015.3	5241.16	46501.3	2852.1		51768	110.806	55994.3	2070.59	54249.7	848.018
231621	231620	231.62	2.36478	2.36478	44528.7	937.944	45991.7	1768.73	48831	1429.65		44181.7	226.916	49091.3	5210.81	46577	2839.79		51844	125.175	56059.3	2070.59	54379.7	872.605
241621	241620	241.62	2.38313	2.38313	44604.3	922.914	46035.3	1769.66	48896	1429.65		44225	255.171	49134.7	5180.26	46631.3	2852.1		51909	151.058	56102.7	2062.06	54455.3	908.147
251621	251620	251.62	2.40075	2.40075	44658.7	916.629	46078.7	1782.45	48961	1410.11		44279.7	269.353	49178	5149.71	46685.7	2838.41		51963	136.12	56146	2031.54	54542.3	918.065
261621	261620	261.62	2.41767	2.41767	44713	931.638	46111	1782.04	49015	1394.89		44333.7	284.01	49232	5110.64	46728.7	2825.7		52006.3	150.723	56178.3	2031.35	54607	938.404
271621	271620	271.62	2.43396	2.43396	44734.7	925.815	46143.7	1782.45	49048	1394.89		44377.3	287.259	49275.3	5080.09	46750.3	2811.96		52049.7	147.967	56189	2025.08	54661.3	968.98
281621	281620	281.62	2.44966	2.44966	44788.7	916.629	46165.3	1769.66	49091	1384.52		44409.7	313.03	49297.3	5064.57	46783	2812		52060.3	162.138	56211	2009.6	54704.7	1004.64
291621	291620	291.62	2.46482	2.46482	44810.7	910.363	46197.7	1769.69	49123.7	1384.83		44442	331.436	49307.7	5034.02	46815.7	2838.41		52093.3	162.138	56232.7	2018.9	54748	999.281
301621	301620	301.62	2.47946	2.47946	44832	901.43	46219.7	1768.73	49145.3	1369.74		44474.7	331.894	49329.7	5018.51	46837	2824.73		52114.7	173.822	56232.7	2018.9	54780.7	1020.06
311621	311620	311.62	2.49363	2.49363	44864.7	904.322	46219.7	1768.73	49167	1379.68		44485.3	336.395	49351	5003.47	46847.7	2838.41		52125.3	162.138	56243.7	2012.64	54813	1044.71
321621	321620	321.62	2.50734	2.50734	44886.3	895.383	46241	1756.36	49199.3	1380.15		44518	361.715	49383.7	4981.47	46869.7	2824.31		52125.3	162.138	56232.7	1997.18	54845.7	1045
331621	331620	331.62	2.52064	2.52064	44897	904.501	46241	1756.36	49210.3	1369.74		44518	381.325	49394.3	4972.92	46891.3	2826.08		52136.3	176.911	56232.7	1997.18	54867.3	1050.45
341621	341620	341.62	2.53354	2.53354	44919	898.682	46241	1756.36	49221.3	1364.94		44529	386.909	49405.3	4964.14	46902	2824.73		52136.3	202.495	56243.7	2012.64	54878.3	1065.89
351621	351620	351.62	2.54607	2.54607	44919	898.682	46262.7	1755.01	49232	1360.45		44550.3	381.486	49416.3	4933.85	46913	2812		52136.3	176.911	56254.3	2006.65	54910.3	1065.89
361621	361620	361.62	2.55825	2.55825	44940.3	889.371	46284.3	1742.67	49221.3	1364.94		44539.7	396.351	49416.3	4935.89	46913	2812		52147	191.355	56243.3	1991.21	54921.3	1081.32
371621	371620	371.62	2.5701	2.5701	44940.3	893.261	46273.7	1755.97	49253.3	1364.94		44550.3	401.857	49416	4911.82	46913	2812		52136.3	202.495	56243.3	1991.21	54932	1096.3
381621	381620	381.62	2.58163	2.58163	44951	898.682	46295.3	1755.43	49253.3	1364.94		44550.3	426.89	49427	4903.03	46924	2810.64		52136.3	202.495	56254	1982.19	54954	1080.86
391621	391620	391.62	2.59286	2.59286	44940.3	893.261	46284.3	1742.67	49264.3	1360.31		44550.3	426.89	49438	4896.32	46924	2810.64		52125.3	214.489	56254	1982.19	54943	1090.3
401621	401620	401.62	2.60382	2.60382	44962.3	887.904	46284.3	1742.67	49264.3	1360.31		44528.7	432.249	49427.3	4881.28	46934.7	2798.28		52114.7	217.158	56243.3	1988.24	54965	1096.3
411621	411620	411.62	2.6145	2.6145	44962.3	887.904	46306.3	1741.71	49275.3	1375.47		44550.7	447.691	49438	4874.81	46934.7	2798.28		52114.7	217.158	56232.7	1973.25	54954	1105.72
421621	421620	421.62	2.62492	2.62492	44962.3	887.904	46306.3	1741.71	49264.3	1380.15		44550.7	447.691	49438	4872.74	46934.7	2798.28		52114.7	217.158	56243.3	1967.2	54975.7	1111.27
431621	431620	431.62	2.6351	2.6351	44962.3	887.904	46306	1715.65	49275.3	1375.47		44528.7	457.181	49427	4859.3	46934.3	2782.94		52093	231.672	56221.7	1957.78	54975.7	1111.27
441621	441620	441.62	2.64505	2.64505	44951.3	882.79	46306.3	1741.71	49286.3	1364.94		44539.7	463.142	49437.7	4850.73	46945.3	2797		52093	231.672	56232.3	1951.75	54975.7	1111.27
451621	451620	451.62	2.65477	2.65477	44951.3	882.79	46306.3	1741.71	49264.3	1360.31		44517.7	447.691	49427	4835.7	46934.3	2782.94		52082	243.208	56232.3	1951.75	54975.7	1111.27
461621	461620	461.62	2.66428	2.66428	44940.7	878.065	46284.3	1727.99	49275.3	1375.47		44507	462.673	49416.3	4842.19	46934.3	2782.94		52060.7	232.015	56221.7	1957.78	54975.7	1111.27
471621	471620	471.62	2.67359	2.67359	44951.3	882.79	46317	1728.41	49275.3	1375.47		44507	462.673	49427	4835.7	46934.3	2782.94		52050	243.208	56211	1942.79	54975.7	1111.27
481621	481620	481.62	2.6827	2.6827	44940.7	878.065	46306	1727.46	49275.3	1375.47		44496	478.13	49416	4820.19	46934.3	2782.94		52039	246.621	56211	1942.79	54975.7	1111.27
491621	491620	491.62	2.69163	2.69163	44918.7	862.867	46284.3	1727.99	49253.7	1370.64		44485.3	469.342	49405.3	4826.68	46913	2770.53		52006.3	246.504	56189	1933.62	54964.7	1117.48
501621	501620	501.62	2.70037	2.70037	44929.7	893.275	46295	1714.69	49253.7	1390.32		44474.7	487.228	49405.3	4826.68	46923.7	2742.46		52006.3	246.504	56189	1933.62	54975.7	1111.27
511621	511620	511.62	2.70895	2.70895	44897	873.575	46295	1714.69	49242.7	1375.15		44464	478.13	49394.7	4811.64	46912.7	2755.29		51995.3	250.81	56178.3	1942.51	54964.7	1117.48
521621	521620	521.62	2.71735	2.71735	44897	873.575	46295	1714.69	49242.7	1375.15		44453	493.594	49394.7	4811.64	46902	2756.47		51984.7	261.185	56167.7	1927.51	54964.7	1117.48
531621	531620	531.62	2.7256	2.7256	44897	873.575	46295	1714.69	49242.7	1400.92		44431	478.13	49394.7	4811.64	46902	2756.47		51963	276.132	56167.7	1927.51	54964.7	1117.48
541621	541620	541.62	2.73369	2.73369	44875.7	878.065	46284.3	1702.31	49221	1390.18		44420.3	493.125	49383.7	4796.13	46891.3	2742.85		51941.3	266.034	56156.7	1912.05	54943	1111.74
551621	551620	551.62	2.74164	2.74164	44864.7	873.438	46273.7	1715.62	49221	1390.18		44398.7	499.878	49372.7	4780.62	46869.7	2741.28		51930.3	276.589	56146	1942.79	54932.3	1117.75
561621	561620	561.62	2.74944	2.74944	44853.7	888.592	46263	1714.69	49210.3	1400.46		44388	493.594	49361.7	4787.35	46891.3	2742.85		51908.7	265.885	56135	1927.32	54932.3	1117.75
571621	571620	571.62	2.75711	2.75711	44832	873.575	46273.7	1701.38	49221	1390.18		44388	493.594	49340.3	4780.83	46869.7	2741.28		51898	276.132	56113.7	1921.32	54921.7	1126.72
581621	581620	581.62	2.76464	2.76464	44821.3	888.27	46263	1714.69	49188.7	1390.32		44355.3	515.12	49340.3	4780.83	46848	2728.85		51887	280.832	56113.7	1921.32	54910.7	1111.27
591621	591620	591.62	2.77204	2.77204	44832	873.575	46262.7	1688.62	49177.7	1400.92		44344.7	506.748	49329.3	4765.32	46859	2727.71		51876	291.254	56102.7	1927.51	54899.7	1117.48
601621	601620	601.62	2.77932	2.77932	44788.7	862.867	46251.7	1687.67	49177.7	1400.92		44333.7	499.878	49318.7	4771.84	46837	2726.67		51844	291.254	56102.7	1927.51	54888.7	1126.72
611621	611620	611.62	2.78648	2.78648	44778	858.434	46251.7	1687.67	49167	1405.36		44301.3	499.611	49318.7	4771.84	46826	2727.71		51833	296.123	56070	1927.32	54878	1111.74
621621	621620	621.62	2.79352	2.79352	44767	873.575	46251.7	1687.67	49145.3	1400.46		44290.3	515.12	49307.7	4759.1	46826	2727.71		51833	296.123	56070	1927.32	54878	1111.74
631621	631620	631.62	2.80046	2.80046	44756	869.194	46241	1700.97	49134.3	1405.05		44279.7	506.748	49275.3	4735.04	46815.3	2714.16		51822	306.419	56059.3	1936.3	54856.7	1126.72
641621	641620	641.62	2.80728	2.80728	44734.7	873.438	46219.7	1687.67	49123.3	1415.61		44258	514.916	49264.3	4741.75	46794	2727.71		51789.3	306.101	56037.7	1927.51	54834.7	1120.67
651621	651620	651.62	2.81399	2.81399	44723.7	862.867	46219.7	1687.67	49123.3	1415.61		44247	530.427	49264.3	4741.75	46783	2713.74		51767.7	321.161	56026.7	1936.77	54823.7	1126.72
661621	661620	661.62	2.82061	2.82061	44691.3	863.327	46208.7	1674.9	49102	1405.36		44225.3	515.12	49242.7	4734.77	46761	2700.84		51757	306.419	56015.7	1921.32	54813	1111.74
671621	671620	671.62	2.82712	2.82712	44691.3	863.327	46219.7	1687.67	49102	1405.36		44204	521.813	49242.7	4734.77	46761	2700.84		51735.3	321.307	56005	1930.38	54791.7	1126.72
681621	681620	681.62	2.83354	2.83354	44669.7	867.689	46197.7	1673.95	49102	1405.36		44204	521.813	49221.3	4726.24	46739.3	2700.2		51735.3	321.307	55983.7	1921.32	54791.7	1126.72
691621	691620	691.62	2.83987	2.83987	44658.7	862.867	46187	1673.03	49069.3	1405.05		44171	521.813	49210.3	4710.73	46739.3	2700.2		51702.7	321.161	55972.7	1930.67	54769.7	1117.48
701621	701620	701.62	2.8461	2.8461	44637	868.001	46187	1673.03	49069.3	1405.05		44160.3	513.772	49210.3	4710.73	46718	2713.74		51692	306.419	55950.7	1921.32	54769.7	1120.67
711621	711620	711.62	2.85225	2.85225	44637	868.001	46165.3	1674.36	49047.7	1400.92		44139	521.813	49177.7	4711.2	46707	2699.78		51681	336.083	55950.7	1921.32	54748	1111.74
721621	721620	721.62	2.85831	2.85831	44604.7	867.689	46165.3	1674.36	49037	1405.36		44117	506.277	49166.7	4695.69	46696.3	2686.26		51648.7	310.975	55929.3	1915.41	54737.3	1117.75
731621	731620	731.62	2.86429	2.86429	44593.7	882.941	46154.3	1673.42	49037	1405.36		44106	521.813	49156	4702.23	46685.3	2699.23		51637.7	321.161	55929.3	1915.41	54715.7	1111.27
741621	741620	741.62	2.87018	2.87018	44561	857.777	46143.3	1660.64	49015.3	1420.24		44095.3	536.879	49134.7	4695.69	46674.3	2700.2		51626.7	326.314	55907.3	1909.43	54693.7	1126.72
751621	751620	751.62	2.876	2.876	44561.3	863.327	46132.7	1659.73	49004.3	1405.05		44063	537.35	49134.7	4695.69	46652.7	2698.84		51616	336.083	55907.3	1909.43	54683	1111.74
761621	761620	761.62	2.88174	2.88174	44539.7	867.689	46111.3	1660.64	48993.3	1415.61		44052	529.077	49112.7	4686.92	46652.7	2698.84		51594.7	326.314	55886	1924.38	54672.3	1120.85
771621	771620	771.62	2.8874	2.8874	44518	873.068	46111	1672.11	48982.7	1400.92		44041	521.813	49102	4671.88	46631.3	2686.26		51572.7	321.161	55864.3	1915.41	54650.7	1111.27
781621	781620	781.62	2.893	2.893	44485.3	872.605	46100.3	1659.7	48961.3	1415.61		44019.7	528.852	49091	4680.65	46620.3	2699.23		51561.7	326.314	55842.3	1909.43	54640	1096.3
791621	791620	791.62	2.89852	2.89852	44474.7	867.689	46100.3	1659.7	48961.3	1415.61		43998	537.35	49069.3	4671.68	46620.3	2699.23		51551	336.083	55842.3	1909.43	54618	1111.74
801621	801620	801.62	2.90397	2.90397	44474.7	867.689	46067.7	1659.73	48939.3	1411.14		43998	537.35	49058.7	4656.63	46587.7	2698.84		51529.3	351.194	55821	1903.73	54607.3	1120.85
811621	811620	811.62	2.90935	2.90935	44453	852.761	46056.7	1658.8	48928.3	1415.61		43965.3	536.879	49026	4656.37	46577	2699.78		51507.7	341.673	55810.3	1909.43	54585.7	1111.27
821621	821620	821.62	2.91467	2.91467	44442	868.001	46046	1646.4	48917.7	1400.92		43954.7	528.852	49026	4656.37	46555.3	2699.23		51496.7	326.314	55799.3	1894.01	54563.7	1126.72
831621	831620	831.62	2.91992	2.91992	44420.3	872.605	46046	1646.4	48896.3	1415.61		43943.7	544.403	49026	4656.37	46555.3	2699.23		51496.7	326.314	55788.3	1899.98	54542	1120.38
841621	841620	841.62	2.92512	2.92512	44409.7	862.881	46035	1645.47	48885.3	1400.46		43921.7	528.852	48993.7	4656.63	46544.3	2685.33		51464.7	326.314	55766.7	1894.48	54531	1129.92
851621	851620	851.62	2.93025	2.93025	44377	863.045	46024	1632.68	48863.7	1396.48		43900.3	536.879	48993.7	4632.38	46522.7	2698.84		51453.7	336.395	55756	1900.27	54499	1129.92
861621	861620	861.62	2.93532	2.93532	44366	857.777	46013.3	1620.29	48863.3	1415.61		43900	535.987	48983	4617.33	46501	2712.73		51442.7	341.673	55734.3	1894.01	54488	1135.81
871621	871620	871.62	2.94033	2.94033	44355.3	848.018	45992	1632.68	48842	1405.36		43878.3	544.158	48950	4617.33	46490.3	2699.23		51431.7	326.314	55723.3	1903.56	54455.3	1135.63
881621	881620	881.62	2.94528	2.94528	44344.7	862.881	45992	1632.68	48831.3	1415.61		43856.7	551.946	48939.3	4623.93	46479.7	2711.83		51410.3	341.207	55723.3	1903.56	54444.7	1144.85
891621	891620	891.62	2.95018	2.95018	44333.7	853.018	45970	1618.96	48820.3	1400.46		43856.7	528.852	48939.3	4623.93	46457.7	2698.84		51399.3	351.194	55701.7	1894.48	54434	1129.92
901621	901620	901.62	2.95502	2.95502	44301.3	853.483	45959.3	1618.06	48787.7	1400.92		43846	543.932	48928.7	4608.89	46457.7	2698.84		51367	351.349	55680	1888.33	54401.3	1151.06
911621	911620	911.62	2.95981	2.95981	44301.3	853.483	45948.3	1605.27	48777	1405.36		43824	551.543	48896	4608.62	46425.3	2699.23		51356.3	356.582	55658	1903.73	54390.7	1160.26
921621	921620	921.62	2.96455	2.96455	44279.7	858.728	45948.3	1605.27	48788	1394.89		43813.3	544.158	48874.7	4600.21	46403.7	2712.76		51367	351.349	55658	1903.73	54368.7	1150.77
931621	931620	931.62	2.96924	2.96924	44258	843.616	45926.3	1618.06	48766	1390.18		43781	543.932	48874.7	4600.21	46392.7	2725.73		51345.3	341.207	55626	1903.73	54347	1145.32
941621	941620	941.62	2.97388	2.97388	44236.3	853.483	45915.7	1605.66	48744.3	1405.05		43781	543.932	48841.7	4600.21	46382	2726.67		51323.3	356.582	55625.7	1882.75	54325.7	1160.26
951621	951620	951.62	2.97846	2.97846	44225.3	843.792	45905	1604.76	48733.7	1390.32		43770	535.987	48841.7	4600.21	46371	2712.73		51323.3	356.582	55615	1888.33	54314.7	1144.85
961621	961620	961.62	2.983	2.983	44225.3	843.792	45883	1591.04	48723	1394.89		43759	551.543	48820.3	4593.57	46360.3	2725.31		51291.3	356.582	55593.3	1883.04	54292.7	1160.26
971621	971620	971.62	2.9875	2.9875	44193	843.616	45872.3	1578.64	48712	1379.68		43748.3	566.628	48787.7	4591.58	46338.7	2712.76		51291.3	356.582	55582.3	1888.8	54260.7	1160.26
981621	981620	981.62	2.99194	2.99194	44182	834.096	45872.3	1604.35	48690	1394.89		43727	551.543	48787.7	4591.58	46317	2726.67		51269.3	351.194	55571.3	1873.39	54249.7	1169.88
991621	991620	991.62	2.99635	2.99635	44171	849.528	45851	1591.04	48679.3	1380.15		43716	543.932	48766.3	4583.23	46295.3	2725.31		51258.3	356.582	55550	1888.33	54228	1181.46
1001621	1001620	1001.62	3.0007	3.0007	44171	849.528	45840	1578.25	48679.3	1380.15		43694	551.543	48733.7	4605.52	46284.3	2726.27		51258.3	356.582	55539.3	1873.39	54206.3	1175.2
1011621	1011620	1011.62	3.00502	3.00502	44149.7	834.564	45829	1577.33	48647	1379.68		43694	551.543	48712	4574.93	46284.3	2726.27		51226.3	356.582	55517.3	1888.8	54195.3	1184.8
1021621	1021620	1021.62	3.00929	3.00929	44128	840.219	45818.3	1564.92	48647	1379.68		43672.7	559.238	48701	4581.93	46252	2726.67		51215.3	341.207	55506.3	1873.39	54162.7	1185.27
1031621	1031620	1031.62	3.01352	3.01352	44106.3	825.04	45796.7	1551.23	48625.3	1369.74		43662	551.543	48690	4566.4	46241.3	2739.23		51204.3	351.194	55485	1888.33	54141	1175.49
1041621	1041620	1041.62	3.01771	3.01771	44095.3	840.499	45785.7	1550.3	48625.3	1369.74		43651	567.1	48679.3	4574.67	46230.3	2740.23		51193.3	356.582	55474.3	1873.39	54119.3	1190.62
1051621	1051620	1051.62	3.02186	3.02186	44084.7	834.564	45774.7	1564.02	48592.7	1369.59		43629	551.543	48668.7	4559.61	46208.3	2739.23		51171.7	346.911	55463.3	1883.04	54097.7	1185.27
1061621	1061620	1061.62	3.02597	3.02597	44073.7	825.228	45753.3	1550.72	48592.7	1369.59		43629	551.543	48646.7	4551.08	46197.7	2740.2		51161	356.116	55441.3	1873.39	54076.3	1200.19
1071621	1071620	1071.62	3.03004	3.03004	44063	840.219	45753.3	1550.72	48571	1365.26		43618	567.1	48646.7	4552.65	46187	2752.74		51139.3	351.194	55430.7	1879.06	54076.3	1200.19
1081621	1081620	1081.62	3.03407	3.03407	44052.3	831.371	45731.3	1537	48560	1370.06		43596.7	552.015	48625	4544.55	46176	2753.78		51128.7	361.256	55409	1870.05	54022	1215.12
1091621	1091620	1091.62	3.03807	3.03807	44041.3	825.04	45720.7	1550.3	48549.3	1374.86		43586	567.1	48614	4529.02	46143.7	2754.17		51117.7	366.175	55398.3	1879.24	54011	1220.99
1101621	1101620	1101.62	3.04203	3.04203	44019.3	831.371	45710	1523.7	48527.7	1369.59		43586	567.1	48614	4529.02	46122	2767.77		51106.7	350.886	55387.7	1885.02	54000	1230.52
1111621	1111620	1111.62	3.04596	3.04596	44008.7	825.228	45699.3	1537	48516.7	1380		43575	559.484	48571	4513.49	46122	2767.77		51096	356.116	55365.7	1879.06	53968	1230.52
1121621	1121620	1121.62	3.04985	3.04985	44008.7	825.228	45688.3	1524.2	48506	1365.26		43553.3	544.158	48571	4536.02	46100.3	2754.87		51085	366.017	55344	1870.05	53946	1245.93
1131621	1131620	1131.62	3.0537	3.0537	43965.3	840.499	45677.3	1523.28	48495	1370.06		43553	567.1	48560	4520.49	46100.3	2781.74		51074.3	351.194	55344	1870.05	53935	1230.52
1141621	1141620	1141.62	3.05752	3.05752	43965	816.357	45656	1509.98	48484	1354.83		43542.3	559.71	48538.7	4512.24	46089.3	2767.73		51063.3	356.582	55311.7	1869.59	53902.7	1255.09
1151621	1151620	1151.62	3.06131	3.06131	43954.3	831.371	45656	1509.98	48452	1354.83		43520.7	567.485	48505.7	4512.24	46067.3	2781.74		51042	371.506	55289.7	1885.02	53881	1245.93
1161621	1161620	1161.62	3.06506	3.06506	43954.3	831.371	45645	1509.08	48452	1354.83		43520.7	567.485	48505.7	4512.24	46056.3	2782.94		51031	356.116	55268.3	1875.92	53859.7	1260.87
1171621	1171620	1171.62	3.06879	3.06879	43922	831.84	45634	1496.26	48441	1365.26		43509.7	583.024	48495	4497.18	46045.7	2795.37		51020	366.017	55257.3	1860.48	53837.7	1255.09
1181621	1181620	1181.62	3.07248	3.07248	43911	822.906	45601.7	1496.68	48419	1354.83		43499	575.036	48484.3	4504.04	46024.3	2782.94		50998.3	356.582	55235.7	1875.63	53816	1270.18
1191621	1191620	1191.62	3.07614	3.07614	43911	822.906	45601.7	1482.06	48419	1354.83		43488.3	567.956	48473.3	4488.5	46002.3	2797		50998.3	356.582	55225	1860.66	53794	1285.58
1201621	1201620	1201.62	3.07977	3.07977	43878.7	822.704	45579.7	1482.96	48397.7	1369.59		43477.7	583.024	48462.3	4495.61	45991.7	2809.41		50987.7	366.175	55214.3	1866.62	53761.7	1289.91
1211621	1211620	1211.62	3.08337	3.08337	43878.7	822.704	45569	1482.09	48387	1354.83		43477.7	583.024	48430.3	4495.61	45981	2810.64		50966	356.116	55203.3	1875.92	53740.3	1304.79
1221621	1221620	1221.62	3.08694	3.08694	43857	807.401	45569	1482.09	48376	1339.61		43455.7	591.553	48419.3	4480.08	45970	2823.42		50966	356.116	55192.3	1860.48	53729.3	1310.35
1231621	1231620	1231.62	3.09048	3.09048	43835.3	814.432	45547.3	1468.76	48354	1354.83		43455.7	591.553	48408.3	4487.23	45948	2810.64		50955	366.017	55160	1860.66	53707.3	1304.79
1241621	1241620	1241.62	3.09399	3.09399	43835.3	814.432	45547.3	1468.76	48343	1339.61		43434	598.094	48387	4479.13	45937.3	2811.96		50922.7	366.175	55160	1860.66	53686	1319.68
1251621	1251620	1251.62	3.09747	3.09747	43824.7	829.486	45525.7	1455.07	48343	1339.61		43423.3	591.29	48365	4470.82	45926.7	2824.31		50922.7	366.175	55149.3	1866.62	53653.3	1344.61
1261621	1261620	1261.62	3.10093	3.10093	43802.7	813.962	45504	1441.74	48332.3	1324.86		43412.3	606.813	48354	4479.13	45904.7	2838.41		50901	356.116	55127.3	1860.48	53642.7	1329.74
1271621	1271620	1271.62	3.10436	3.10436	43802.7	813.962	45504	1441.74	48311	1339.61		43401.7	598.565	48343.3	4486.15	45904.7	2838.41		50901	381.325	55127.3	1860.48	53621	1344.91
1281621	1281620	1281.62	3.10776	3.10776	43781	798.702	45493.3	1440.88	48300	1324.4		43390.7	591.553	48321.3	4477.87	45883.3	2826.08		50879	371.506	55116.7	1869.59	53599.3	1359.95
1291621	1291620	1291.62	3.11113	3.11113	43759	805.681	45482.3	1428.05	48289	1329.25		43380	606.604	48310.7	4462.8	45872.7	2838.41		50879	371.506	55095	1860.66	53577.3	1354.59
1301621	1301620	1301.62	3.11448	3.11448	43759	805.681	45460.7	1440.47	48289	1329.25		43380	606.604	48278.3	4462.33	45861.7	2839.84		50868.3	356.582	55073.3	1875.92	53545.3	1354.59
1311621	1311620	1311.62	3.11781	3.11781	43759	805.681	45471.3	1427.17	48278.3	1314.47		43358.3	591.29	48267.3	4469.64	45850.7	2852.53		50857.7	366.175	55062.3	1860.48	53545	1374.83
1321621	1321620	1321.62	3.12111	3.12111	43727	805.681	45439.3	1427.17	48256.7	1329.56		43347.3	606.813	48256.7	4476.77	45818.3	2852.1		50847	371.506	55040.7	1851.63	53523.3	1369.9
1331621	1331620	1331.62	3.12438	3.12438	43727	805.681	45417.3	1413.45	48245.7	1314.32		43347.3	606.813	48235	4469.09	45807.3	2853.56		50825	366.017	55040.7	1851.63	53502	1384.76
1341621	1341620	1341.62	3.12763	3.12763	43727	805.681	45417.3	1413.45	48235	1299.55		43336.7	598.565	48213.3	4484.42	45807.3	2880.38		50825	366.017	55019	1845.22	53480	1374.83
1351621	1351620	1351.62	3.13085	3.13085	43683	797.351	45396	1400.15	48213.3	1314.47		43315	606.604	48191.3	4476.3	45785.7	2867.68		50803.3	381.022	55019	1845.22	53480	1374.83
1361621	1361620	1361.62	3.13406	3.13406	43683	797.351	45396	1400.15	48202.3	1299.24		43315	606.604	48180.7	4483.55	45785.7	2867.68		50792.7	366.175	54997.3	1860.48	53447.7	1375.13
1371621	1371620	1371.62	3.13723	3.13723	43672.3	789.482	45374	1386.43	48202.7	1319.3		43315	606.604	48137.3	4467.76	45764	2881.48		50782	371.506	54997.3	1860.48	53447.7	1399.62
1381621	1381620	1381.62	3.14039	3.14039	43672.3	789.482	45374	1386.43	48180.7	1314.32		43282.3	606.813	48137.3	4467.76	45753.3	2883.05		50771	381.325	54975.3	1851.16	53426	1390.17
1391621	1391620	1391.62	3.14352	3.14352	43650.7	774.156	45363.3	1385.6	48170	1299.55		43282.3	606.813	48105	4490.44	45753.3	2883.05		50760	366.017	54954	1845.22	53404.3	1405.36
1401621	1401620	1401.62	3.14663	3.14663	43640	789.239	45352.7	1373.13	48159	1304.49		43271.7	621.866	48094.3	4475.36	45742.3	2895.63		50749	371.506	54954	1845.22	53404.3	1405.36
1411621	1411620	1411.62	3.14972	3.14972	43618.3	773.928	45341.7	1372.27	48137.3	1299.24		43260.7	615.12	48083.3	4459.8	45720.7	2883.48		50738.3	381.022	54943.3	1851.16	53382.3	1395.57
1421621	1421620	1421.62	3.15278	3.15278	43607.3	789.482	45330.7	1359.42	48126.7	1304.03		43239	622.128	48072.3	4467.44	45710	2895.68		50716.7	376.445	54932.3	1835.71	53371.7	1405.06
1431621	1431620	1431.62	3.15583	3.15583	43607.3	789.482	45320	1346.96	48126.7	1304.03		43239	622.128	48072.3	4467.44	45699.3	2897.28		50727.7	386.442	54910.7	1830.06	53350	1420.25
1441621	1441620	1441.62	3.15885	3.15885	43585.7	774.156	45320	1358.58	48105	1299.55		43239	622.128	48061.7	4452.36	45688.3	2899.01		50706	381.325	54910.7	1830.06	53328.3	1410.95
1451621	1451620	1451.62	3.16185	3.16185	43585.7	774.156	45298.3	1345.26	48094	1304.49		43206.7	621.866	48029	4451.96	45677.3	2911.52		50706	381.325	54888.7	1820.73	53317.7	1416.51
1461621	1461620	1461.62	3.16483	3.16483	43585.7	774.156	45298.3	1345.26	48083	1289.23		43206.7	621.866	48018.3	4459.49	45677.3	2911.52		50695	366.017	54878	1829.78	53307	1425.86
1471621	1471620	1471.62	3.1678	3.1678	43564.3	781.589	45287.3	1332.4	48072.3	1299.24		43206.7	621.866	47996.7	4452.2	45656	2925.35		50673.3	381.022	54867.3	1835.71	53285	1416.22
1481621	1481620	1481.62	3.17074	3.17074	43564.3	781.589	45266	1319.1	48051	1289.23		43184.7	630.619	47985.7	4436.64	45656	2925.35		50673.3	381.022	54856.7	1820.73	53285	1441.25
1491621	1491620	1491.62	3.17366	3.17366	43553.3	773.928	45266	1319.1	48051	1289.23		43195.7	615.12	47975	4421.56	45645	2927.14		50641	381.325	54845.7	1830.06	53274.3	1421.92
1501621	1501620	1501.62	3.17656	3.17656	43542.3	766.032	45244.3	1317.44	48029	1284.33		43174	622.128	47964.3	4429.16	45634	2912.85		50630	366.017	54823.7	1820.73	53241.7	1422.39
1511621	1511620	1511.62	3.17944	3.17944	43531.3	781.589	45244.3	1317.44	48040	1273.98		43174	622.128	47964.3	4429.16	45612.3	2927.08		50630	386.909	54813	1829.78	53231	1428.23
1521621	1521620	1521.62	3.18231	3.18231	43520.7	774.156	45233.3	1304.56	48018	1289.23		43152.7	630.619	47964.3	4429.16	45601.3	2928.95		50619.3	396.351	54813	1829.78	53220	1434.39
1531621	1531620	1531.62	3.18515	3.18515	43510	766.504	45211.7	1291.23	47986	1289.23		43152.7	630.619	47931.7	4406.4	45590.7	2941.01		50608.3	381.022	54780.7	1830.06	53198.3	1427.94
1541621	1541620	1541.62	3.18798	3.18798	43510	766.504	45201	1290.43	47986	1289.23		43152.7	630.619	47931.3	4429.16	45569.3	2928.95		50597.3	391.202	54780.7	1830.06	53187.7	1455.7
1551621	1551620	1551.62	3.19079	3.19079	43499	758.845	45201	1290.43	47975	1273.98		43130.7	637.392	47921	4414.08	45580	2942.85		50576	381.325	54780.7	1830.06	53166	1446.47
1561621	1561620	1561.62	3.19358	3.19358	43477.3	766.032	45179	1276.71	47953.3	1269.57		43119.7	630.619	47921	4414.08	45558.3	2941.38		50576	381.325	54759	1799.66	53155	1455.51
1571621	1571620	1571.62	3.19635	3.19635	43477.3	766.032	45179	1276.71	47942.3	1274.44		43119.7	630.619	47888	4414.08	45547.3	2943.29		50565	391.516	54748	1829.78	53133.3	1446.94
1581621	1581620	1581.62	3.1991	3.1991	43466.7	758.602	45168.3	1264.22	47942.3	1274.44		43098.3	637.182	47877.3	4399	45547.3	2943.29		50543.3	386.61	54737.3	1814.81	53122.7	1453.32
1591621	1591620	1591.62	3.20184	3.20184	43456	750.947	45157.7	1263.42	47942.3	1274.44		43098.3	637.182	47877.3	4399	45526	2957.2		50532.3	391.202	54715.7	1805.28	53101	1468.56
1601621	1601620	1601.62	3.20456	3.20456	43434	758.845	45146.7	1262.61	47910	1273.98		43087.7	630.619	47877.3	4399	45526	2957.2		50521.3	401.727	54704.7	1814.63	53090.3	1475.08
1611621	1611620	1611.62	3.20726	3.20726	43434	758.845	45135.7	1249.7	47910	1273.98		43098.3	637.182	47866.3	4383.44	45515	2969.59		50532.3	391.202	54704.7	1814.63	53079.3	1481.93
1621621	1621620	1621.62	3.20995	3.20995	43423	750.947	45135.7	1249.7	47899	1279.02		43065.7	637.392	47845	4398.52	45504	2971.55		50500	391.516	54683	1805.74	53068.7	1488.7
1631621	1631620	1631.62	3.21262	3.21262	43412.3	743.52	45125	1223.11	47877.3	1274.44		43065.7	637.392	47845	4375.76	45493.3	2973.54		50500	391.516	54672	1815.1	53035.7	1488.7
1641621	1641620	1641.62	3.21527	3.21527	43401.7	758.602	45103.3	1235.6	47877.3	1274.44		43044	622.128	47834.3	4383.44	45482.3	2959.15		50478.3	386.61	54650.7	1830.06	53025	1495.6
1651621	1651620	1651.62	3.21791	3.21791	43391	750.947	45103.3	1235.6	47855.3	1264.21		43044	645.652	47834	4360.52	45471.7	2971.12		50467.3	391.202	54628.7	1820.73	53003.3	1487.76
1661621	1661620	1661.62	3.22053	3.22053	43401.7	758.602	45081.7	1221.92	47855.3	1264.21		43033.3	637.182	47812.3	4375.85	45460.7	2973.16		50456.3	401.727	54618	1826.75	53014	1502.83
1671621	1671620	1671.62	3.22314	3.22314	43380	743.291	45081.7	1221.92	47855.3	1264.21		43022.3	652.708	47801.7	4360.76	45460.7	2973.16		50445.7	387.068	54596.3	1818.06	52992.7	1494.89
1681621	1681620	1681.62	3.22573	3.22573	43347.3	743.52	45071	1209.4	47823.3	1264.21		43011.7	646.122	47790.7	4345.21	45450	2975.22		50435	397.679	54585.3	1827.22	52981.7	1502.36
1691621	1691620	1691.62	3.2283	3.2283	43347.3	743.52	45060	1194.55	47812.3	1248.93		43000.7	637.392	47790.7	4345.21	45439	2987.5		50435	397.679	54585.3	1827.22	52960.3	1517.45
1701621	1701620	1701.62	3.23086	3.23086	43347.3	743.52	45070.7	1195.31	47801.3	1254.08		42990	652.448	47780	4352.97	45428	2989.65		50402.3	397.561	54563.7	1820.73	52949.3	1525.05
1711621	1711620	1711.62	3.23341	3.23341	43347.3	743.52	45038.3	1194.91	47801.3	1254.08		42990	652.448	47758.3	4345.44	45428	2989.65		50402.3	397.561	54563.7	1820.73	52927.3	1517.45
1721621	1721620	1721.62	3.23594	3.23594	43347.3	743.52	45038	1180.85	47779.7	1249.4		42979	667.977	47758.3	4322.33	45406.7	3003.65		50391.7	408.466	54531.3	1821.01	52906	1509.73
1731621	1731620	1731.62	3.23845	3.23845	43315	743.291	45038	1180.85	47779.7	1249.4		42979	667.977	47736.3	4337.89	45406.7	3003.65		50380.7	412.236	54531.3	1821.01	52895	1540.13
1741621	1741620	1741.62	3.24095	3.24095	43315	743.291	45005.7	1180.82	47779.7	1249.4		42968	661.157	47725.7	4322.81	45406.7	3003.65		50359	408.916	54498.7	1820.73	52873.7	1532.54
1751621	1751620	1751.62	3.24344	3.24344	43315	743.291	45016.3	1167.53	47747.3	1248.93		42946.7	667.766	47725.7	4322.81	45384.7	3018.11		50359	408.916	54498.7	1820.73	52851.7	1548.09
1761621	1761620	1761.62	3.24591	3.24591	43293.3	727.966	45016.3	1167.53	47747.3	1248.93		42936	661.157	47715	4307.59	45384.7	3018.11		50359	408.916	54509.3	1811.75	52851.7	1548.09
1771621	1771620	1771.62	3.24837	3.24837	43293.3	727.966	45005.3	1154.59	47725.7	1244.42		42935.7	659.322	47704	4315.05	45374	3004.09		50348	412.692	54488	1805.74	52851.7	1548.09
1781621	1781620	1781.62	3.25082	3.25082	43260.7	728.209	44984	1167.14	47714.7	1249.4		42925	676.664	47693.3	4299.97	45352.7	3018.11		50337	397.679	54477.3	1811.75	52819.3	1547.62
1791621	1791620	1791.62	3.25325	3.25325	43271.3	736.105	44994.7	1153.85	47714.7	1223.95		42903	661.157	47682.3	4308.06	45352.7	3018.11		50326.3	408.572	54466.3	1821.01	52808.3	1555.46
1801621	1801620	1801.62	3.25566	3.25566	43260.7	728.209	44984	1141.3	47703.7	1234.13		42914	667.977	47693.3	4299.97	45352.7	3018.11		50305	397.679	54455.3	1805.56	52808.3	1555.46
1811621	1811620	1811.62	3.25807	3.25807	43260.7	728.209	44973	1140.53	47693	1244.11		42892.3	676.194	47671.3	4292.51	45341.7	3020.4		50294	408.916	54444.3	1811.75	52786.7	1548.33
1821621	1821620	1821.62	3.26046	3.26046	43250	721.03	44962.3	1139.81	47682.3	1229.34		42892.3	676.194	47671.3	4292.51	45341.7	3020.4		50294	408.916	54433.7	1820.73	52786.3	1571.01
1831621	1831620	1831.62	3.26284	3.26284	43228.3	727.966	44951.3	1126.85	47660.7	1244.42		42881.7	667.766	47650	4285.31	45330.7	3032.57		50272.3	405.346	54412.3	1811.75	52765	1563.64
1841621	1841620	1841.62	3.2652	3.2652	43217.3	720.559	44940.3	1126.11	47649.7	1229.2		42881.3	691.704	47650	4285.31	45320	3034.81		50261.3	408.572	54412	1790.3	52754	1571.7
1851621	1851620	1851.62	3.26755	3.26755	43217.3	720.559	44919	1112.82	47638.7	1234.13		42860	676.664	47639	4269.76	45298.3	3032.13		50250.3	420.076	54390.3	1805.56	52743	1579.19
1861621	1861620	1861.62	3.26989	3.26989	43206.7	713.628	44919	1112.82	47617.3	1229.34		42860	676.664	47628.3	4276.96	45320	3034.81		50250.3	420.076	54379.3	1811.75	52721.3	1571.45
1871621	1871620	1871.62	3.27222	3.27222	43196	705.485	44919	1112.82	47617.3	1229.34		42838.3	683.036	47617.3	4262.86	45298.3	3048.95		50218.3	420.076	54379.3	1811.75	52710.7	1578.72
1881621	1881620	1881.62	3.27453	3.27453	43196	705.485	44919	1112.82	47617.3	1229.34		42838.3	683.036	47617.3	4262.86	45287.3	3034.45		50218.3	420.076	54347	1809.26	52710.7	1578.72
1891621	1891620	1891.62	3.27683	3.27683	43174	713.886	44908	1112.11	47595.7	1218.87		42827.3	698.566	47606.3	4247.31	45265.7	3048.88		50207.3	405.346	54336.3	1818.06	52678	1579.19
1901621	1901620	1901.62	3.27912	3.27912	43163	705.485	44886.3	1112.41	47585	1204.08		42816.3	691.704	47595.7	4254.46	45276.3	3046.6		50196.3	417.23	54325.3	1802.58	52667.3	1587.01
1911621	1911620	1911.62	3.2814	3.2814	43163	705.485	44875.7	1099.83	47574	1214.44		42805.7	683.295	47585	4262.38	45265.7	3048.88		50174.7	405.792	54314.3	1811.75	52667.3	1587.01
1921621	1921620	1921.62	3.28367	3.28367	43141.7	713.628	44875.7	1085.83	47552.3	1229.34		42795	698.354	47574.3	4247.31	45254.7	3051.3		50164	417.308	54314.7	1808.79	52656.3	1595.17
1931621	1931620	1931.62	3.28592	3.28592	43131	705.485	44854	1098.41	47541.3	1214.12		42795	698.354	47563.3	4231.76	45244	3063.02		50164	417.308	54293	1802.86	52634.7	1586.78
1941621	1941620	1941.62	3.28816	3.28816	43120	698.354	44864.7	1085.13	47541.3	1214.12		42762.3	698.566	47541.7	4224.05	45244	3063.02		50142	415.008	54293	1802.86	52635	1610.25
1951621	1951620	1951.62	3.2904	3.2904	43120	698.354	44832.3	1084.73	47541.3	1214.12		42762.3	698.566	47541.7	4224.9	45233.3	3048.95		50142.3	405.346	54293	1802.86	52613	1625.8
1961621	1961620	1961.62	3.29261	3.29261	43120	698.354	44832.3	1084.73	47520	1204.08		42762.3	698.566	47530.7	4232.23	45233.3	3065.39		50110	415.008	54260.3	1802.58	52602	1610.25
1971621	1971620	1971.62	3.29482	3.29482	43098.3	683.036	44832	1070.77	47520	1204.08		42751.7	713.628	47519.7	4216.68	45222.3	3077.47		50120.7	403.135	54238.7	1796.76	52591.3	1618.27
1981621	1981620	1981.62	3.29702	3.29702	43087.3	698.566	44810.7	1057.49	47509	1214.44		42741	705.485	47519.7	4216.68	45200.7	3065.84		50088	429.416	54238.7	1796.76	52570	1610.25
1991621	1991620	1991.62	3.29921	3.29921	43087.3	698.566	44800	1070.77	47498	1199.22		42729.7	722.259	47509	4201.6	45190	3077.54		50088	429.416	54228	1802.86	52559	1618.52
2001621	2001620	2001.62	3.30138	3.30138	43065.7	683.295	44800	1070.77	47498	1199.22		42719	713.886	47509	4201.6	45200.7	3091.63		50077	415.008	54217	1787.39	52537.3	1633.81

## Sheet: Sheet2
lg time	HZZ-C	HZZ-S	HZZ-M	lg time	CY-C	CY-S	CY-M	lg time	DYH-C	DYH-S	DYH-M
-2	162	162	162	-2	195	205.667	162	-2	195	184	195
-1.69897	6805	7401.33	7867	-1.69897	7629	8734	8604	-1.69897	7607.33	8398.33	8084
-1.52288	7130	7791.33	8268	-1.52288	8019	9200	9048.67	-1.52288	8008	8842.33	8528
-1.39794	7314.33	7997.33	8506.33	-1.39794	8224.67	9503.33	9330	-1.39794	8235.33	9113.33	8788
-1.30103	7477	8192.33	8723.33	-1.30103	8452.33	9785.33	9612	-1.30103	8463.33	9373.33	9048.67
-1.22185	7650.67	8398	8951	-1.22185	8658.33	10078	9893.67	-1.22185	8690.67	9644.67	9319.33
-1.1549	7845.67	8625.67	9189.33	-1.1549	8875	10359.7	10197	-1.1549	8929.33	9926.33	9601.33
-1.09691	8019	8842.33	9438.33	-1.09691	9103	10684.7	10500.7	-1.09691	9189	10219	9904.33
-1.04576	8214	9070	9677	-1.04576	9341.33	11009.7	10836.7	-1.04576	9449.33	10511.3	10208
-1	8409	9308.33	9948	-1	9557.67	11334.7	11150.7	-1	9698.67	10804	10522.3
-0.958607	8604.33	9536.33	10208	-0.958607	9796.33	11660	11486.7	-0.958607	9959	11107.7	10825.7
-0.920819	8810	9807	10490	-0.920819	10034.7	11985	11823	-0.920819	10218.7	11400	11139.7
-0.886057	9027	10045.3	10739	-0.886057	10262	12310.3	12148	-0.886057	10489.7	11714.3	11476
-0.853872	9232.67	10284	11031.3	-0.853872	10511.3	12646.3	12483.3	-0.853872	10739	11996	11779.3
-0.823909	9449.33	10533	11313.3	-0.823909	10728.3	12949.7	12830.7	-0.823909	10988.3	12288.3	12093.7
-0.79588	9644.33	10771.7	11573.3	-0.79588	10955.7	13264	13155.7	-0.79588	11248.3	12581.7	12408
-0.769551	9872	11020.7	11833.7	-0.769551	11183.3	13589.3	13481	-0.769551	11497.7	12852.3	12722
-0.744727	10078	11270	12104.7	-0.744727	11400	13892.7	13806	-0.744727	11746.7	13134	13014.7
-0.721246	10283.7	11508.3	12375.3	-0.721246	11627.7	14185	14109	-0.721246	11963.7	13394	13307
-0.69897	10490	11736	12635.3	-0.69897	11833.7	14466.7	14434.3	-0.69897	12212.7	13676	13600
-0.677781	10695.7	11974.3	12884.7	-0.677781	12050.3	14759.7	14738	-0.677781	12440.3	13935.7	13892.7
-0.657577	10890.7	12180.7	13145	-0.657577	12256.3	15030.3	15030.3	-0.657577	12668.3	14174.3	14163.3
-0.638272	11086	12408	13394	-0.638272	12451.3	15301.7	15323	-0.638272	12895.7	14423.7	14434.3
-0.619789	11291.7	12635.3	13643.3	-0.619789	12657.3	15561.3	15615.7	-0.619789	13112.3	14672.7	14716
-0.60206	11476	12852.3	13871	-0.60206	12852	15832.3	15886.7	-0.60206	13318	14900.3	14976
-0.585027	11660	13047.3	14109	-0.585027	13036.3	16070.7	16168.7	-0.585027	13513	15127.7	15225.3
-0.568636	11855.3	13264	14337	-0.568636	13220.7	16330.7	16428.3	-0.568636	13730	15355.3	15474.7
-0.552842	12039.3	13480.3	14564.7	-0.552842	13405	16569.3	16710	-0.552842	13935.7	15572	15713.3
-0.537602	12213	13676	14803	-0.537602	13589	16797	16970	-0.537602	14120.3	15789	15962.3
-0.522879	12386	13860	15009	-0.522879	13762.3	17035.7	17219.7	-0.522879	14315.3	15995	16211.7
-0.508638	12581.3	14055.3	15225.3	-0.508638	13936	17263	17458	-0.508638	14499.3	16200.7	16417.3
-0.49485	12733	14250.3	15453.3	-0.49485	14109	17468.7	17718	-0.49485	14694.3	16406.7	16666.7
-0.481486	12917.3	14423.3	15648.3	-0.481486	14282.3	17696	17945.7	-0.481486	14878.3	16591	16883.7
-0.468521	13069	14597	15854	-0.468521	14445.3	17902	18173.3	-0.468521	15041.3	16785.7	17100.3
-0.455932	13231.3	14770.3	16060.3	-0.455932	14586.3	18097.3	18400.7	-0.455932	15214.3	16970	17317
-0.443697	13405	14943.3	16255.3	-0.443697	14759.7	18292.3	18639	-0.443697	15388	17154.3	17512
-0.431798	13556.7	15117	16439.3	-0.431798	14922	18487.7	18856	-0.431798	15561.3	17317	17717.7
-0.420216	13708.3	15290.7	16634.3	-0.420216	15063	18682.7	19061.7	-0.420216	15724	17512	17934.7
-0.408935	13870.7	15453	16807.7	-0.408935	15214.7	18866.7	19278.7	-0.408935	15876	17674.7	18119
-0.39794	14022.3	15605	16991.7	-0.39794	15355.7	19040	19484.3	-0.39794	16027.3	17837	18314
-0.387216	14163.7	15756.3	17176	-0.387216	15507	19213.3	19679.7	-0.387216	16190	17988.7	18498.7
-0.376751	14315.3	15897.3	17338.7	-0.376751	15648	19397.7	19885.3	-0.376751	16341.7	18151.7	18682.7
-0.366532	14456	16060	17533.7	-0.366532	15778	19571	20080.7	-0.366532	16482.7	18314	18855.7
-0.356547	14597	16211.3	17696.7	-0.356547	15919	19733.7	20275.7	-0.356547	16634.3	18455	19040
-0.346787	14727	16341.3	17858.7	-0.346787	16049.3	19896.3	20459.7	-0.346787	16775.3	18617.3	19224.3
-0.337242	14868	16493.3	18010.7	-0.337242	16179.3	20048.3	20633.3	-0.337242	16905.3	18747.7	19386.7
-0.327902	14998	16612.3	18173	-0.327902	16309.3	20210.7	20795.7	-0.327902	17035	18899	19549.3
-0.318759	15128	16764.3	18335.7	-0.318759	16439.3	20362	20991	-0.318759	17176	19040.3	19712
-0.309804	15258	16894.3	18498	-0.309804	16547.3	20514	21164.3	-0.309804	17306	19181	19875
-0.30103	15377	17013.3	18639	-0.30103	16677.3	20644	21337.7	-0.30103	17436	19311	20026.3
-0.29243	15517.7	17143.7	18780	-0.29243	16796.7	20795.7	21489.3	-0.29243	17566	19441	20189
-0.283997	15626.7	17273.7	18932	-0.283997	16916	20936.3	21651.7	-0.283997	17685.3	19571	20329.7
-0.275724	15756.7	17392.7	19073	-0.275724	17035	21066.3	21825	-0.275724	17804.7	19701	20481.3
-0.267606	15864.7	17522.7	19213.7	-0.267606	17132.7	21207.3	21966	-0.267606	17924	19809.7	20611.3
-0.259637	15973.3	17631.3	19343.7	-0.259637	17252	21338	22129	-0.259637	18054	19929	20763
-0.251812	16092.7	17750.7	19484.3	-0.251812	17360.3	21457	22269.7	-0.251812	18173	20059	20904
-0.244125	16200.7	17869.7	19614.3	-0.244125	17469	21576	22410.7	-0.244125	18281.3	20156.3	21034
-0.236572	16330.7	17978	19744.3	-0.236572	17577.3	21706	22551.3	-0.236572	18389.7	20275.7	21186
-0.229148	16428.7	18097.7	19874.7	-0.229148	17674.7	21825.3	22692.3	-0.229148	18487.7	20394.7	21305.3
-0.221849	16525.7	18194.7	19993.7	-0.221849	17783	21944.7	22833.3	-0.221849	18607	20503.3	21424.7
-0.21467	16634.3	18314	20123.7	-0.21467	17880.7	22063.7	22974	-0.21467	18704	20600.3	21554.7
0.00860017	20600.3	22236.7	24664.3	0.00860017	21500	26171	27861.3	0.00860017	22497	24437	25997.3
0.049218	20936.7	22573	25022.3	0.049218	21781.7	26485.3	28251.7	0.049218	22800.3	24729.3	26322.3
0.0863598	21207.7	22855	25325.7	0.0863598	22020.3	26756	28587.3	0.0863598	23038.7	24978.7	26582.7
0.120574	21456.7	23082.3	25574.7	0.120574	22237.3	26983.7	28847.7	0.120574	23244.7	25184.7	26788.3
0.152288	21652	23288	25780.3	0.152288	22410.3	27167.7	29064	0.152288	23418	25369	26940
0.181844	21825.3	23439.7	25954	0.181844	22562	27341	29248.7	0.181844	23580.7	25509.7	27081
0.209515	21966	23591.7	26105.7	0.209515	22692.3	27482	29411	0.209515	23700	25618.3	27189.7
0.235528	22096	23722	26236.3	0.235528	22811.3	27590.3	29552	0.235528	23830	25726.7	27287
0.260071	22204.3	23819.7	26344.3	0.260071	22898	27698.7	29660.3	0.260071	23938.7	25802.3	27363
0.283301	22313	23916.7	26431	0.283301	23006.7	27807.3	29768.7	0.283301	24047	25878	27428
0.305351	22399.7	24014.7	26539.3	0.305351	23104	27894	29866.3	0.305351	24133.7	25943.3	27482
0.326336	22475.3	24079.7	26615	0.326336	23201.3	27970	29953	0.326336	24242	25997.3	27547
0.346353	22562	24144.7	26702	0.346353	23288	28056.7	30040	0.346353	24339.3	26051.7	27601.3
0.365488	22638	24209.7	26777.7	0.365488	23375	28143.3	30115.7	0.365488	24437	26116.7	27666.3
0.383815	22724.7	24274.7	26842.7	0.383815	23483.3	28208.3	30202.3	0.383815	24545	26138.3	27720.7
0.401401	22790	24350.3	26918.7	0.401401	23570	28295	30267	0.401401	24643	26203.3	27785.7
0.418301	22865.7	24415.3	27005.3	0.418301	23656.7	28371	30365	0.418301	24751	26268.3	27850.7
0.434569	22941.3	24480.3	27092	0.434569	23765	28457.3	30451.3	0.434569	24859.7	26311.7	27937.7
0.450249	23017.3	24556.3	27179	0.450249	23873.3	28522.3	30549	0.450249	24968	26365.7	28002.3
0.465383	23093.3	24599.3	27265.3	0.465383	23971	28620	30635.7	0.465383	25098	26420.3	28089.3
0.480007	23158.3	24675.3	27363	0.480007	24079.7	28706.3	30722.3	0.480007	25206.3	26474.3	28175.7
0.494155	23245	24740.3	27438.7	0.494155	24198.3	28772	30841.7	0.494155	25336.3	26539.3	28273
0.507856	23331.7	24827	27547	0.507856	24306.7	28869.3	30950	0.507856	25466.7	26604.3	28371
0.521138	23429	24892	27655.7	0.521138	24415.3	28967	31047.3	0.521138	25596.7	26669.3	28479
0.534026	23494	24968	27753	0.534026	24534.3	29064	31166.7	0.534026	25715.7	26723.7	28587.7
0.546543	23613.3	25054.7	27861.3	0.546543	24643	29151	31286	0.546543	25856.3	26810	28706.7
0.558709	23689.3	25130.3	27970	0.558709	24772.7	29259.3	31405.3	0.558709	25986.3	26864.3	28804
0.570543	23786.7	25217.3	28089	0.570543	24892	29357	31524.7	0.570543	26127.3	26951	28923.3
0.582063	23895	25293.3	28208	0.582063	25000.3	29454.3	31654.7	0.582063	26268.3	27016.3	29053.7
0.593286	23982	25369.3	28338.3	0.593286	25119.3	29552	31795.3	0.593286	26409.3	27092	29172.7
0.604226	24079.3	25456	28457.7	0.604226	25260.3	29649.7	31925	0.604226	26550.3	27178.7	29302.7
0.614897	24187.7	25542.3	28576.7	0.614897	25379.7	29768.7	32055.3	0.614897	26691	27254.7	29432.7
0.625312	24285.3	25629	28706.7	0.625312	25499.3	29866.3	32207	0.625312	26832	27330.3	29562.7
0.635484	24393.7	25726.7	28826	0.635484	25629	29975	32337	0.635484	26983.7	27417	29693
0.645422	24502	25824	28956	0.645422	25759	30083.3	32467	0.645422	27124.7	27503.7	29844.3
0.655138	24610.3	25910.7	29086	0.655138	25878.3	30191.7	32629.7	0.655138	27265.3	27590.7	29974.3
0.664642	24718.7	26008.3	29205	0.664642	26008.3	30300	32770.3	0.664642	27406.3	27677	30104.3
0.673942	24827.3	26094.7	29357	0.673942	26127.3	30408	32922.3	0.673942	27557.7	27763.7	30245.3
0.683047	24935.3	26192.3	29487.3	0.683047	26246.7	30516.3	33074	0.683047	27688	27850.7	30397.3
0.691965	25055	26279.3	29606.3	0.691965	26376.7	30625	33204	0.691965	27850.7	27937.3	30527.3
0.700704	25152	26387.3	29747.3	0.700704	26506.7	30733.3	33356	0.700704	27980.7	28024.3	30657.3
0.70927	25260.7	26485.3	29877.3	0.70927	26625.7	30852.3	33507.7	0.70927	28110.7	28100	30809.3
0.717671	25369	26582.3	30007.3	0.717671	26756	30960.7	33659	0.717671	28273.3	28197.3	30950.3
0.725912	25477.3	26691	30137	0.725912	26875.3	31058.3	33811	0.725912	28392.7	28284	31080.3
0.733999	25585.3	26789	30278	0.733999	26994.3	31188.3	33951.7	0.733999	28533.3	28360	31210.3
0.741939	25704.7	26875.3	30408	0.741939	27124.7	31285.7	34092.7	0.741939	28663.7	28457.3	31340.3
0.749736	25813.3	26983.7	30538	0.749736	27222	31394.3	34244.3	0.749736	28793.7	28544.3	31481
0.757396	25921.3	27081.3	30668	0.757396	27341.3	31502.7	34396	0.757396	28934.3	28652.7	31632.3
0.764923	26030	27178.7	30798	0.764923	27460.7	31611	34548	0.764923	29064.3	28717.7	31741
0.772322	26138.7	27276.3	30928.3	0.772322	27579.7	31730.3	34688.7	0.772322	29194.3	28826	31882
0.779596	26257.7	27395.7	31058.3	0.779596	27699	31838.7	34819	0.779596	29324.3	28912.3	32023
0.786751	26365.7	27482	31188.3	0.786751	27818.3	31925.7	34970.3	0.786751	29454.3	28988.3	32142
0.79379	26485.3	27579.7	31318.3	0.79379	27926.7	32044.3	35111.3	0.79379	29584.7	29075.3	32283
0.800717	26582.7	27688	31437.7	0.800717	28034.7	32153	35252.3	0.800717	29704	29173	32391.3
0.807535	26691.3	27774.7	31568	0.807535	28154	32250.3	35393	0.807535	29823	29248.7	32532.3
0.814248	26799.3	27883	31687	0.814248	28251.3	32358.7	35534	0.814248	29953	29346	32651.3
0.820858	26897	27969.7	31806	0.820858	28370.7	32467	35664	0.820858	30072	29432.7	32781.3
0.827369	27005.3	28078.3	31936	0.827369	28457.3	32564.7	35805	0.827369	30191.3	29519.7	32900.7
0.833784	27113.7	28164.7	32044.7	0.833784	28566	32673	35924	0.833784	30300	29606.3	33020
0.840106	27211.3	28262.3	32152.7	0.840106	28685	32781.3	36075.7	0.840106	30419	29682.3	33128
0.846337	27330.7	28371	32282.7	0.846337	28782.7	32867.7	36195	0.846337	30538	29768.7	33258
0.85248	27427.7	28468.3	32402.3	0.85248	28890.7	32976.7	36325.3	0.85248	30646.3	29855.7	33388.3
0.858537	27525.7	28566	32521.3	0.858537	28988.7	33085.3	36455.3	0.858537	30787.3	29942	33496.7
0.864511	27623.3	28652.7	32640.7	0.864511	29086	33161	36574.3	0.864511	30885	30028.7	33605
0.870404	27731.3	28761	32749.3	0.870404	29194.3	33280	36715	0.870404	30993.3	30104.3	33724.7
0.876218	27829	28837	32857.3	0.876218	29292	33377.7	36845.3	0.876218	31112.7	30191.3	33832.7
0.881955	27926.3	28945	32966	0.881955	29378.7	33464.3	36953.7	0.881955	31221	30267	33941
0.887617	28035	29032	33085	0.887617	29476	33561.7	37083.7	0.887617	31318.3	30354	34049.3
0.893207	28132.3	29129.3	33193	0.893207	29573.7	33659.3	37192.3	0.893207	31427	30430	34168.3
0.898725	28230	29227	33290.7	0.898725	29671	33756.7	37322.3	0.898725	31535	30516.3	34277
0.904174	28327.3	29313.7	33388.3	0.904174	29758	33854	37419.7	0.904174	31633	30592.3	34374.3
0.909556	28414	29400	33507.7	0.909556	29855.7	33952	37560.3	0.909556	31741	30668.3	34483
0.914872	28511.7	29487	33615.7	0.914872	29963.7	34038.3	37669	0.914872	31838.7	30744	34591
0.920123	28620	29584.3	33713.3	0.920123	30050.7	34125	37777.7	0.920123	31957.7	30820	34678
0.925312	28717.7	29671	33810.7	0.925312	30137.3	34222.7	37885.7	0.925312	32055.3	30895.7	34797
0.93044	28815	29768.7	33919.3	0.93044	30234.7	34309.3	37994	0.93044	32142	30993.3	34894.7
0.935507	28891	29855.7	34027.7	0.935507	30321.3	34396	38113.3	0.935507	32250.3	31047.7	34981.3
0.940516	28977.7	29931.3	34114.3	0.940516	30408.3	34482.7	38221.3	0.940516	32337	31145	35089.7
0.945469	29075	30029	34223	0.945469	30506	34569.7	38319.3	0.945469	32435	31210	35198.3
0.950365	29172.7	30126.3	34320.3	0.950365	30581.7	34667.3	38449.3	0.950365	32532	31275	35295.7
0.955207	29248.3	30191.3	34429	0.955207	30679	34743	38514.3	0.955207	32640.7	31350.7	35393.3
0.959995	29346.3	30289	34515.3	0.959995	30754.7	34840.3	38644.3	0.959995	32727	31426.7	35490.7
0.964731	29432.7	30365	34602	0.964731	30852.7	34916.3	38741.7	0.964731	32825	31513.3	35599.3
0.969416	29519.7	30451.3	34710.3	0.969416	30928.3	35003.3	38828.3	0.969416	32933	31578.7	35696.3
0.974051	29628	30549	34797	0.974051	31026	35079	38947.7	0.974051	33009	31654.3	35761.3
0.978637	29704	30614	34883.7	0.978637	31091	35176.3	39045.3	0.978637	33106.7	31719.3	35870
0.983175	29801	30701	34970.7	0.983175	31188.3	35252.3	39142.7	0.983175	33193.3	31795.3	35967.3
0.987666	29877	30776.7	35067.7	0.987666	31264.3	35339	39240.3	0.987666	33290.7	31881.7	36043
0.992111	29964	30863	35165.7	0.992111	31340.3	35425.3	39327	0.992111	33366.7	31946.7	36141
0.996512	30050.7	30950	35273.7	0.996512	31437.3	35501.3	39414	0.996512	33453.3	32022.7	36238
1.00087	30148	31026	35349.7	1.00087	31502.3	35577	39511	1.00087	33550.7	32088	36336
1.00518	30213	31101.7	35436.7	1.00518	31589.3	35653	39609	1.00518	33637.7	32163.7	36422.7
1.00945	30310.7	31177.3	35523	1.00945	31676	35729	39684.7	1.00945	33713.3	32217.7	36509.3
1.01368	30386.3	31264	35610	1.01368	31752	35816	39782	1.01368	33811	32293.7	36607
1.01787	30473	31329.3	35707.3	1.01787	31827.7	35891.7	39868.7	1.01787	33897.7	32369.7	36682.7
1.02202	30549	31427	35783.3	1.02202	31914.3	35956.7	39966.7	1.02202	33984.3	32445.3	36758.7
1.02612	30646.3	31492	35881	1.02612	31990.3	36032.7	40063.7	1.02612	34060.3	32499.7	36867
1.03019	30711.3	31557	35957	1.03019	32055.7	36108.7	40150.7	1.03019	34147	32575.7	36953.7
1.03423	30798.3	31643.7	36043.3	1.03423	32142	36195	40226.7	1.03423	34233.3	32640.7	37029.7
1.03822	30874.3	31719.3	36130	1.03822	32217.7	36260	40313	1.03822	34309.7	32705.7	37116
1.04218	30950.3	31784.3	36206	1.04218	32293.7	36325	40410.7	1.04218	34407	32770.7	37203
1.0461	31026	31871.3	36292.7	1.0461	32358.7	36401	40497.3	1.0461	34472	32846.7	37289.7
1.04999	31112.3	31947	36379.3	1.04999	32445.3	36477	40573.3	1.04999	34558.7	32911.7	37365.3
1.05385	31188.3	32012	36476.7	1.05385	32510.3	36552.7	40659.7	1.05385	34645.3	32976.3	37463
1.05767	31264	32077	36552.7	1.05767	32597.3	36617.7	40746.7	1.05767	34710.3	33041.3	37539
1.06145	31340	32152.7	36628.7	1.06145	32651.3	36693.3	40811.7	1.06145	34797.3	33106.3	37614.7
1.06521	31427	32228.7	36704.3	1.06521	32727.3	36758.3	40876.7	1.06521	34883.7	33182.3	37701.3
1.06893	31481.3	32293.7	36791	1.06893	32792	36823.3	40974.3	1.06893	34948.7	33236.7	37788
1.07262	31557	32358.7	36856	1.07262	32868	36888.3	41039.3	1.07262	35013.7	33290.7	37864
1.07628	31643.3	32434.7	36942.7	1.07628	32955	36964.3	41115.3	1.07628	35100.3	33366.7	37950.7
1.0799	31708.3	32499.7	37007.7	1.0799	33020	37029.3	41212.3	1.0799	35187.3	33420.7	38015.7
1.0835	31773.3	32575.7	37094.7	1.0835	33085	37094.3	41277.3	1.0835	35252.3	33496.3	38102.7
1.08707	31849.3	32640.7	37159.7	1.08707	33161	37148.7	41342.3	1.08707	35317.3	33561.3	38178.7
1.09061	31925.3	32705.3	37246.3	1.09061	33236.7	37224.3	41429.3	1.09061	35382.3	33605	38254.3
1.09412	31990.3	32770.7	37311.3	1.09412	33279.7	37278.7	41505.3	1.09412	35480	33680.7	38330
1.0976	32066	32835.7	37398.3	1.0976	33366.7	37343.7	41570.3	1.0976	35534	33745.7	38406
1.10106	32141.7	32900.7	37463.3	1.10106	33420.7	37419.7	41646	1.10106	35610	33810.7	38492.3
1.10449	32206.7	32955	37528.3	1.10449	33485.7	37474	41711	1.10449	35685.7	33865	38568.3
1.10789	32272	33030.7	37604	1.10789	33550.7	37528	41786.7	1.10789	35740.3	33919.3	38633.3
1.11126	32337	33085	37668.7	1.11126	33615.7	37593.3	41852	1.11126	35826.7	33984.3	38709.3
1.11461	32402.3	33139	37734	1.11461	33681	37647.7	41917	1.11461	35891.7	34049.3	38785
1.11793	32467.3	33215	37820.7	1.11793	33756.7	37734	41992.7	1.11793	35956.7	34103.3	38871.7
1.12123	32532.3	33280	37885.7	1.12123	33800	37766.7	42068.7	1.12123	36021.7	34168.7	38936.7
1.1245	32597.3	33334	37961.3	1.1245	33865	37831.7	42133.7	1.1245	36086.7	34233.7	39001.7
1.12775	32673	33399	38026.7	1.12775	33930	37896.7	42209.7	1.12775	36151.7	34277.3	39077.7
1.13098	32727.3	33464	38091.7	1.13098	33995	37940	42263.7	1.13098	36216.7	34331.3	39142.7
1.13418	32792.3	33496.7	38167.3	1.13418	34060.3	38005	42318	1.13418	36281.7	34396.3	39218.7
1.13735	32857.3	33561.7	38221.7	1.13735	34114.7	38059.3	42394	1.13735	36346.7	34461.3	39294.7
1.14051	32922.7	33626.7	38297.3	1.14051	34168.7	38102.3	42459	1.14051	36400.7	34504.7	39359.7
1.14364	32987.7	33681	38362.3	1.14364	34244.7	38167.3	42513	1.14364	36465.7	34558.7	39424.7
1.18526	33897.7	34537.3	39337.7	1.18526	35089.7	38980.3	43456	1.18526	37365.7	35404	40454
1.21272	34374.3	34992	39868.7	1.21272	35545	39414	43954.3	1.21272	37842.3	35870	41017.7
1.23855	34818.7	35404	40356.3	1.23855	35967.3	39804	44398.7	1.23855	38286.7	36281.7	41537.7
1.26293	35230.3	35772.7	40801	1.26293	36336	40150.7	44799.7	1.26293	38677	36682.7	42003.7
1.28601	35588.3	36086.7	41180	1.28601	36661	40465	45168	1.28601	39002	37040.3	42415.3
1.30792	35902.7	36379.3	41548.3	1.30792	36954	40746.7	45482.3	1.30792	39283.7	37333.3	42794.7
1.32879	36173.3	36639.3	41874	1.32879	37203	40985	45764	1.32879	39576.3	37625.7	43120
1.34869	36433.3	36888.3	42155.3	1.34869	37452.3	41212.7	46024	1.34869	39825.3	37907.3	43434.3
1.36773	36661	37084	42426.3	1.36773	37669	41429	46252	1.36773	40009.7	38124	43705
1.38596	36867.3	37268	42675.7	1.38596	37853.3	41603	46457.7	1.38596	40226.7	38351.7	43965
1.40346	37051.3	37420	42892.3	1.40346	38016	41776.3	46663.7	1.40346	40389	38536	44192.7
1.42029	37213.7	37582.3	43098	1.42029	38178.3	41928	46837.3	1.42029	40562.3	38731	44409.7
1.43648	37376	37734	43293.3	1.43648	38308.3	42068.7	46999.7	1.43648	40703.3	38883	44583
1.45209	37506.3	37842.3	43466.7	1.45209	38460.3	42198.7	47140.3	1.45209	40855	39034.3	44778
1.46716	37647.3	37961.3	43629.3	1.46716	38579	42307	47292	1.46716	40985.3	39175.3	44951.3
1.48173	37777.3	38059	43792	1.48173	38687.7	42437	47411.3	1.48173	41093.7	39305.3	45092
1.49582	37874.7	38156.7	43943.3	1.49582	38807	42534.7	47541.3	1.49582	41201.7	39435.3	45255
1.50947	37983	38265	44084.3	1.50947	38904.3	42621.3	47650	1.50947	41310	39543.7	45385
1.5227	38091.7	38351.7	44214.3	1.5227	38991	42729.7	47747.7	1.5227	41429.3	39652.3	45525.7
1.53555	38189	38427.7	44344.3	1.53555	39088.7	42816.7	47866.7	1.53555	41505.3	39749.7	45645
1.54802	38276	38503.3	44474.3	1.54802	39142.7	42903	47953	1.54802	41613.3	39847	45775
1.56015	38362.7	38579	44593.3	1.56015	39229.3	42990	48072.3	1.56015	41678.7	39933.7	45894.3
1.57194	38438.7	38644	44702	1.57194	39294.3	43076.3	48170.3	1.57194	41765.3	40031.3	45991.7
1.58343	38535.7	38709	44810.7	1.58343	39381	43152.3	48235.3	1.58343	41852	40118.3	46111
1.59461	38600.7	38774	44908	1.59461	39467.7	43228.3	48332.7	1.59461	41928	40183.3	46219.3
1.60552	38687.7	38850.3	45006	1.60552	39544	43304	48408.3	1.60552	42004	40259.3	46317
1.61616	38763.3	38926	45125	1.61616	39598	43369	48495	1.61616	42090.3	40345.7	46414.3
1.62655	38817.3	38969.3	45201	1.62655	39684.3	43445	48582	1.62655	42155.3	40410.7	46501
1.63669	38893.3	39034.3	45298	1.63669	39749.3	43521	48657.7	1.63669	42220.3	40486.3	46598.7
1.6466	38969.3	39088.3	45396	1.6466	39814.7	43596.7	48755	1.6466	42296.3	40562.3	46706.7
1.65629	39023.7	39153.3	45482.3	1.65629	39890.7	43640	48820	1.65629	42361.3	40627.3	46793.7
1.66577	39088.7	39197	45569	1.66577	39944.7	43727	48907	1.66577	42437.3	40692.3	46880.3
1.67504	39153.7	39251.3	45645	1.67504	40009.7	43791.7	48972	1.67504	42513	40725	46967
1.68413	39218.7	39305.3	45742.3	1.68413	40074.7	43846	49058.7	1.68413	42578	40801	47064.7
1.69302	39283.3	39370.3	45818.3	1.69302	40140	43943.3	49145.3	1.69302	42643	40866	47151.3
1.70174	39337.7	39413.7	45905	1.70174	40205	43987	49221.3	1.70174	42719	40931	47238.3
1.71029	39403	39457	45970	1.71029	40259	44062.7	49297	1.71029	42773	40985	47314
1.71867	39446.3	39522	46045.7	1.71867	40324	44116.7	49373	1.71867	42859.7	41039	47400.3
1.72689	39511.3	39565.3	46121.3	1.72689	40378.3	44192.7	49449	1.72689	42935.7	41093.7	47476.7
1.73496	39565.3	39619.7	46186.7	1.73496	40454	44258	49535.3	1.73496	42979	41158.7	47573.7
1.74288	39630.3	39674	46262.7	1.74288	40508.3	44322.7	49600.3	1.74288	43055	41190.7	47639
1.75066	39684.3	39717	46338.7	1.75066	40551.3	44387.7	49687.3	1.75066	43098.3	41255.7	47725.7
1.75831	39738.7	39760.7	46392.7	1.75831	40616.3	44463.7	49752.3	1.75831	43174	41321	47801.7
1.76582	39771.7	39804	46457.7	1.76582	40660	44518	49828	1.76582	43239	41364.7	47866.7
1.7732	39836.7	39858	46544.3	1.7732	40736	44593.7	49914.7	1.7732	43282.3	41429.7	47953.3
1.78046	39890.7	39890.7	46609.7	1.78046	40790	44658.7	49990.7	1.78046	43358.3	41483.7	48029
1.7876	39944.7	39955.7	46653	1.7876	40844.3	44713	50044.7	1.7876	43412.7	41526.7	48116
1.79463	39998.7	39988	46717.7	1.79463	40898.3	44789	50131.3	1.79463	43488.3	41581	48159
1.80154	40053	40053	46793.7	1.80154	40952.7	44864.7	50207.3	1.80154	43543	41635.3	48256.7
1.80835	40107.3	40096.7	46858.7	1.80835	41017.3	44919	50283.3	1.80835	43597	41679	48321.7
1.81505	40150.7	40128.7	46902.3	1.81505	41071.3	44983.7	50348	1.81505	43651	41743.7	48386.7
1.82164	40194	40172.3	46956.3	1.82164	41115	45038.3	50424	1.82164	43727	41787	48452
1.82814	40248.3	40226.7	47010.3	1.82814	41191	45103	50500	1.82814	43770.3	41830.7	48538.3
1.83455	40291.3	40269.7	47075.3	1.83455	41245	45179	50575.7	1.83455	43846	41895.7	48603.7
1.84086	40345.3	40302.7	47129.7	1.84086	41288.3	45233	50662.3	1.84086	43900.3	41938.7	48679.7
1.84708	40378.3	40356.7	47183.7	1.84708	41364.3	45298.3	50727.3	1.84708	43954.3	41971.3	48744.7
1.85321	40443.3	40389	47237.7	1.85321	41397	45352.3	50792.3	1.85321	44008.7	42036.3	48809.3
1.85926	40486.3	40443.3	47303	1.85926	41462	45417.3	50879.3	1.85926	44063	42079.7	48863.7
1.86522	40529.7	40486.3	47367.7	1.86522	41516.3	45482.3	50955	1.86522	44127.7	42133.7	48939.3
1.87111	40573.3	40530	47411.3	1.87111	41570.3	45547.7	51031	1.87111	44203.7	42188	49004.3
1.87691	40616.7	40573.3	47454.7	1.87691	41635	45612.3	51096	1.87691	44236.3	42231.3	49069.3
1.88264	40670.7	40616.3	47519.7	1.88264	41678.7	45655.7	51171.7	1.88264	44301	42274.7	49123.7
1.88829	40703.3	40649.3	47552	1.88829	41732.7	45710	51226	1.88829	44366.3	42339.3	49199.7
1.89387	40746.7	40692.3	47606.3	1.89387	41798	45775	51323.3	1.89387	44420.3	42383	49275.3
1.89938	40789.7	40746.7	47671.7	1.89938	41863	45839.7	51377.7	1.89938	44474.3	42437.3	49329.3
1.90482	40844.3	40779	47726	1.90482	41906.3	45894.3	51453.3	1.90482	44528.7	42480.3	49383.7
1.9102	40876.7	40811.7	47758	1.9102	41971	45948.3	51518.7	1.9102	44593.7	42534.3	49448.7
1.91551	40909.3	40855	47823	1.91551	42014.3	46013.3	51594.3	1.91551	44647.7	42567	49502.7
1.92075	40974.3	40898	47856	1.92075	42079.7	46067.7	51670	1.92075	44702	42643.3	49568
1.92593	41006.7	40941.7	47910	1.92593	42133.7	46122	51735.3	1.92593	44756.3	42686.3	49632.7
1.93105	41039.3	40985	47964	1.93105	42188	46165	51800.7	1.93105	44810.3	42729.7	49687.3
1.93611	41093.7	41028.3	48007.3	1.93611	42242	46219.3	51876.3	1.93611	44864.3	42773.3	49763
1.94111	41136.7	41060.7	48050.7	1.94111	42307.3	46273.7	51941.3	1.94111	44930	42827.3	49828
1.94606	41169.3	41093.3	48094.3	1.94606	42361.3	46338.7	52006.3	1.94606	44973.3	42892.3	49871.3
1.95095	41212.7	41136.7	48159.3	1.95095	42404.7	46382	52071.3	1.95095	45038	42925	49936.7
1.95578	41245	41169	48191.7	1.95578	42448.3	46403.7	52147.3	1.95578	45092	42968	49991
2.00698	41711	41613.7	48711.7	2.00698	43076.3	46913	52862.3	2.00698	45688.3	43531.7	50651.7
2.04774	42079.3	41949.7	49145.3	2.04774	43575	47281.3	53426	2.04774	46165	44008.7	51160.7
2.085	42426.3	42285.3	49535.3	2.085	44019.3	47574	53892	2.085	46576.7	44420.3	51637.7
2.11932	42762.3	42589	49892.7	2.11932	44409.7	47823.3	54325.3	2.11932	46967.3	44821.3	52092.7
2.15112	43076.7	42860	50240	2.15112	44734.7	48039.7	54672.3	2.15112	47303	45168.3	52515.7
2.18076	43336.7	43098.7	50532.7	2.18076	45005.3	48235.3	54965	2.18076	47617.3	45450	52873.3
2.2085	43564	43315.3	50792.7	2.2085	45233	48387	55214	2.2085	47845	45699	53176.7
2.23457	43770.3	43499.3	51052.7	2.23457	45406.3	48527.7	55409.3	2.23457	48061.3	45915.7	53458
2.25916	43954.7	43662	51237	2.25916	45569	48657.7	55582.7	2.25916	48257	46078.3	53664.3
2.28244	44106	43791.7	51399	2.28244	45677.7	48766.3	55712.7	2.28244	48408.3	46208.3	53881
2.30453	44236.3	43911	51551	2.30453	45786	48863.7	55821	2.30453	48549	46316.7	54022
2.32556	44355.3	43997.3	51670.3	2.32556	45861.7	48950.3	55918.3	2.32556	48668.7	46414.3	54163
2.34561	44442	44084.3	51768	2.34561	45937.7	49015.3	55994.3	2.34561	48755	46501.3	54249.7
2.36478	44528.7	44181.7	51844	2.36478	45991.7	49091.3	56059.3	2.36478	48831	46577	54379.7
2.38313	44604.3	44225	51909	2.38313	46035.3	49134.7	56102.7	2.38313	48896	46631.3	54455.3
2.40075	44658.7	44279.7	51963	2.40075	46078.7	49178	56146	2.40075	48961	46685.7	54542.3
2.41767	44713	44333.7	52006.3	2.41767	46111	49232	56178.3	2.41767	49015	46728.7	54607
2.43396	44734.7	44377.3	52049.7	2.43396	46143.7	49275.3	56189	2.43396	49048	46750.3	54661.3
2.44966	44788.7	44409.7	52060.3	2.44966	46165.3	49297.3	56211	2.44966	49091	46783	54704.7
2.46482	44810.7	44442	52093.3	2.46482	46197.7	49307.7	56232.7	2.46482	49123.7	46815.7	54748
2.47946	44832	44474.7	52114.7	2.47946	46219.7	49329.7	56232.7	2.47946	49145.3	46837	54780.7
2.49363	44864.7	44485.3	52125.3	2.49363	46219.7	49351	56243.7	2.49363	49167	46847.7	54813
2.50734	44886.3	44518	52125.3	2.50734	46241	49383.7	56232.7	2.50734	49199.3	46869.7	54845.7
2.52064	44897	44518	52136.3	2.52064	46241	49394.3	56232.7	2.52064	49210.3	46891.3	54867.3
2.53354	44919	44529	52136.3	2.53354	46241	49405.3	56243.7	2.53354	49221.3	46902	54878.3
2.54607	44919	44550.3	52136.3	2.54607	46262.7	49416.3	56254.3	2.54607	49232	46913	54910.3
2.55825	44940.3	44539.7	52147	2.55825	46284.3	49416.3	56243.3	2.55825	49221.3	46913	54921.3
2.5701	44940.3	44550.3	52136.3	2.5701	46273.7	49416	56243.3	2.5701	49253.3	46913	54932
2.58163	44951	44550.3	52136.3	2.58163	46295.3	49427	56254	2.58163	49253.3	46924	54954
2.59286	44940.3	44550.3	52125.3	2.59286	46284.3	49438	56254	2.59286	49264.3	46924	54943
2.60382	44962.3	44528.7	52114.7	2.60382	46284.3	49427.3	56243.3	2.60382	49264.3	46934.7	54965
2.6145	44962.3	44550.7	52114.7	2.6145	46306.3	49438	56232.7	2.6145	49275.3	46934.7	54954
2.62492	44962.3	44550.7	52114.7	2.62492	46306.3	49438	56243.3	2.62492	49264.3	46934.7	54975.7
2.6351	44962.3	44528.7	52093	2.6351	46306	49427	56221.7	2.6351	49275.3	46934.3	54975.7
2.64505	44951.3	44539.7	52093	2.64505	46306.3	49437.7	56232.3	2.64505	49286.3	46945.3	54975.7
2.65477	44951.3	44517.7	52082	2.65477	46306.3	49427	56232.3	2.65477	49264.3	46934.3	54975.7
2.66428	44940.7	44507	52060.7	2.66428	46284.3	49416.3	56221.7	2.66428	49275.3	46934.3	54975.7
2.67359	44951.3	44507	52050	2.67359	46317	49427	56211	2.67359	49275.3	46934.3	54975.7
2.6827	44940.7	44496	52039	2.6827	46306	49416	56211	2.6827	49275.3	46934.3	54975.7
2.69163	44918.7	44485.3	52006.3	2.69163	46284.3	49405.3	56189	2.69163	49253.7	46913	54964.7
2.70037	44929.7	44474.7	52006.3	2.70037	46295	49405.3	56189	2.70037	49253.7	46923.7	54975.7
2.70895	44897	44464	51995.3	2.70895	46295	49394.7	56178.3	2.70895	49242.7	46912.7	54964.7
2.71735	44897	44453	51984.7	2.71735	46295	49394.7	56167.7	2.71735	49242.7	46902	54964.7
2.7256	44897	44431	51963	2.7256	46295	49394.7	56167.7	2.7256	49242.7	46902	54964.7
2.73369	44875.7	44420.3	51941.3	2.73369	46284.3	49383.7	56156.7	2.73369	49221	46891.3	54943
2.74164	44864.7	44398.7	51930.3	2.74164	46273.7	49372.7	56146	2.74164	49221	46869.7	54932.3
2.74944	44853.7	44388	51908.7	2.74944	46263	49361.7	56135	2.74944	49210.3	46891.3	54932.3
2.75711	44832	44388	51898	2.75711	46273.7	49340.3	56113.7	2.75711	49221	46869.7	54921.7
2.76464	44821.3	44355.3	51887	2.76464	46263	49340.3	56113.7	2.76464	49188.7	46848	54910.7
2.77204	44832	44344.7	51876	2.77204	46262.7	49329.3	56102.7	2.77204	49177.7	46859	54899.7
2.77932	44788.7	44333.7	51844	2.77932	46251.7	49318.7	56102.7	2.77932	49177.7	46837	54888.7
2.78648	44778	44301.3	51833	2.78648	46251.7	49318.7	56070	2.78648	49167	46826	54878
2.79352	44767	44290.3	51833	2.79352	46251.7	49307.7	56070	2.79352	49145.3	46826	54878
2.80046	44756	44279.7	51822	2.80046	46241	49275.3	56059.3	2.80046	49134.3	46815.3	54856.7
2.80728	44734.7	44258	51789.3	2.80728	46219.7	49264.3	56037.7	2.80728	49123.3	46794	54834.7
2.81399	44723.7	44247	51767.7	2.81399	46219.7	49264.3	56026.7	2.81399	49123.3	46783	54823.7
2.82061	44691.3	44225.3	51757	2.82061	46208.7	49242.7	56015.7	2.82061	49102	46761	54813
2.82712	44691.3	44204	51735.3	2.82712	46219.7	49242.7	56005	2.82712	49102	46761	54791.7
2.83354	44669.7	44204	51735.3	2.83354	46197.7	49221.3	55983.7	2.83354	49102	46739.3	54791.7
2.83987	44658.7	44171	51702.7	2.83987	46187	49210.3	55972.7	2.83987	49069.3	46739.3	54769.7
2.8461	44637	44160.3	51692	2.8461	46187	49210.3	55950.7	2.8461	49069.3	46718	54769.7
2.85225	44637	44139	51681	2.85225	46165.3	49177.7	55950.7	2.85225	49047.7	46707	54748
2.85831	44604.7	44117	51648.7	2.85831	46165.3	49166.7	55929.3	2.85831	49037	46696.3	54737.3
2.86429	44593.7	44106	51637.7	2.86429	46154.3	49156	55929.3	2.86429	49037	46685.3	54715.7
2.87018	44561	44095.3	51626.7	2.87018	46143.3	49134.7	55907.3	2.87018	49015.3	46674.3	54693.7
2.876	44561.3	44063	51616	2.876	46132.7	49134.7	55907.3	2.876	49004.3	46652.7	54683
2.88174	44539.7	44052	51594.7	2.88174	46111.3	49112.7	55886	2.88174	48993.3	46652.7	54672.3
2.8874	44518	44041	51572.7	2.8874	46111	49102	55864.3	2.8874	48982.7	46631.3	54650.7
2.893	44485.3	44019.7	51561.7	2.893	46100.3	49091	55842.3	2.893	48961.3	46620.3	54640
2.89852	44474.7	43998	51551	2.89852	46100.3	49069.3	55842.3	2.89852	48961.3	46620.3	54618
2.90397	44474.7	43998	51529.3	2.90397	46067.7	49058.7	55821	2.90397	48939.3	46587.7	54607.3
2.90935	44453	43965.3	51507.7	2.90935	46056.7	49026	55810.3	2.90935	48928.3	46577	54585.7
2.91467	44442	43954.7	51496.7	2.91467	46046	49026	55799.3	2.91467	48917.7	46555.3	54563.7
2.91992	44420.3	43943.7	51496.7	2.91992	46046	49026	55788.3	2.91992	48896.3	46555.3	54542
2.92512	44409.7	43921.7	51464.7	2.92512	46035	48993.7	55766.7	2.92512	48885.3	46544.3	54531
2.93025	44377	43900.3	51453.7	2.93025	46024	48993.7	55756	2.93025	48863.7	46522.7	54499
2.93532	44366	43900	51442.7	2.93532	46013.3	48983	55734.3	2.93532	48863.3	46501	54488
2.94033	44355.3	43878.3	51431.7	2.94033	45992	48950	55723.3	2.94033	48842	46490.3	54455.3
2.94528	44344.7	43856.7	51410.3	2.94528	45992	48939.3	55723.3	2.94528	48831.3	46479.7	54444.7
2.95018	44333.7	43856.7	51399.3	2.95018	45970	48939.3	55701.7	2.95018	48820.3	46457.7	54434
2.95502	44301.3	43846	51367	2.95502	45959.3	48928.7	55680	2.95502	48787.7	46457.7	54401.3
2.95981	44301.3	43824	51356.3	2.95981	45948.3	48896	55658	2.95981	48777	46425.3	54390.7
2.96455	44279.7	43813.3	51367	2.96455	45948.3	48874.7	55658	2.96455	48788	46403.7	54368.7
2.96924	44258	43781	51345.3	2.96924	45926.3	48874.7	55626	2.96924	48766	46392.7	54347
2.97388	44236.3	43781	51323.3	2.97388	45915.7	48841.7	55625.7	2.97388	48744.3	46382	54325.7
2.97846	44225.3	43770	51323.3	2.97846	45905	48841.7	55615	2.97846	48733.7	46371	54314.7
2.983	44225.3	43759	51291.3	2.983	45883	48820.3	55593.3	2.983	48723	46360.3	54292.7
2.9875	44193	43748.3	51291.3	2.9875	45872.3	48787.7	55582.3	2.9875	48712	46338.7	54260.7
2.99194	44182	43727	51269.3	2.99194	45872.3	48787.7	55571.3	2.99194	48690	46317	54249.7
2.99635	44171	43716	51258.3	2.99635	45851	48766.3	55550	2.99635	48679.3	46295.3	54228
3.0007	44171	43694	51258.3	3.0007	45840	48733.7	55539.3	3.0007	48679.3	46284.3	54206.3
3.00502	44149.7	43694	51226.3	3.00502	45829	48712	55517.3	3.00502	48647	46284.3	54195.3
3.00929	44128	43672.7	51215.3	3.00929	45818.3	48701	55506.3	3.00929	48647	46252	54162.7
3.01352	44106.3	43662	51204.3	3.01352	45796.7	48690	55485	3.01352	48625.3	46241.3	54141
3.01771	44095.3	43651	51193.3	3.01771	45785.7	48679.3	55474.3	3.01771	48625.3	46230.3	54119.3
3.02186	44084.7	43629	51171.7	3.02186	45774.7	48668.7	55463.3	3.02186	48592.7	46208.3	54097.7
3.02597	44073.7	43629	51161	3.02597	45753.3	48646.7	55441.3	3.02597	48592.7	46197.7	54076.3
3.03004	44063	43618	51139.3	3.03004	45753.3	48646.7	55430.7	3.03004	48571	46187	54076.3
3.03407	44052.3	43596.7	51128.7	3.03407	45731.3	48625	55409	3.03407	48560	46176	54022
3.03807	44041.3	43586	51117.7	3.03807	45720.7	48614	55398.3	3.03807	48549.3	46143.7	54011
3.04203	44019.3	43586	51106.7	3.04203	45710	48614	55387.7	3.04203	48527.7	46122	54000
3.04596	44008.7	43575	51096	3.04596	45699.3	48571	55365.7	3.04596	48516.7	46122	53968
3.04985	44008.7	43553.3	51085	3.04985	45688.3	48571	55344	3.04985	48506	46100.3	53946
3.0537	43965.3	43553	51074.3	3.0537	45677.3	48560	55344	3.0537	48495	46100.3	53935
3.05752	43965	43542.3	51063.3	3.05752	45656	48538.7	55311.7	3.05752	48484	46089.3	53902.7
3.06131	43954.3	43520.7	51042	3.06131	45656	48505.7	55289.7	3.06131	48452	46067.3	53881
3.06506	43954.3	43520.7	51031	3.06506	45645	48505.7	55268.3	3.06506	48452	46056.3	53859.7
3.06879	43922	43509.7	51020	3.06879	45634	48495	55257.3	3.06879	48441	46045.7	53837.7
3.07248	43911	43499	50998.3	3.07248	45601.7	48484.3	55235.7	3.07248	48419	46024.3	53816
3.07614	43911	43488.3	50998.3	3.07614	45601.7	48473.3	55225	3.07614	48419	46002.3	53794
3.07977	43878.7	43477.7	50987.7	3.07977	45579.7	48462.3	55214.3	3.07977	48397.7	45991.7	53761.7
3.08337	43878.7	43477.7	50966	3.08337	45569	48430.3	55203.3	3.08337	48387	45981	53740.3
3.08694	43857	43455.7	50966	3.08694	45569	48419.3	55192.3	3.08694	48376	45970	53729.3
3.09048	43835.3	43455.7	50955	3.09048	45547.3	48408.3	55160	3.09048	48354	45948	53707.3
3.09399	43835.3	43434	50922.7	3.09399	45547.3	48387	55160	3.09399	48343	45937.3	53686
3.09747	43824.7	43423.3	50922.7	3.09747	45525.7	48365	55149.3	3.09747	48343	45926.7	53653.3
3.10093	43802.7	43412.3	50901	3.10093	45504	48354	55127.3	3.10093	48332.3	45904.7	53642.7
3.10436	43802.7	43401.7	50901	3.10436	45504	48343.3	55127.3	3.10436	48311	45904.7	53621
3.10776	43781	43390.7	50879	3.10776	45493.3	48321.3	55116.7	3.10776	48300	45883.3	53599.3
3.11113	43759	43380	50879	3.11113	45482.3	48310.7	55095	3.11113	48289	45872.7	53577.3
3.11448	43759	43380	50868.3	3.11448	45460.7	48278.3	55073.3	3.11448	48289	45861.7	53545.3
3.11781	43759	43358.3	50857.7	3.11781	45471.3	48267.3	55062.3	3.11781	48278.3	45850.7	53545
3.12111	43727	43347.3	50847	3.12111	45439.3	48256.7	55040.7	3.12111	48256.7	45818.3	53523.3
3.12438	43727	43347.3	50825	3.12438	45417.3	48235	55040.7	3.12438	48245.7	45807.3	53502
3.12763	43727	43336.7	50825	3.12763	45417.3	48213.3	55019	3.12763	48235	45807.3	53480
3.13085	43683	43315	50803.3	3.13085	45396	48191.3	55019	3.13085	48213.3	45785.7	53480
3.13406	43683	43315	50792.7	3.13406	45396	48180.7	54997.3	3.13406	48202.3	45785.7	53447.7
3.13723	43672.3	43315	50782	3.13723	45374	48137.3	54997.3	3.13723	48202.7	45764	53447.7
3.14039	43672.3	43282.3	50771	3.14039	45374	48137.3	54975.3	3.14039	48180.7	45753.3	53426
3.14352	43650.7	43282.3	50760	3.14352	45363.3	48105	54954	3.14352	48170	45753.3	53404.3
3.14663	43640	43271.7	50749	3.14663	45352.7	48094.3	54954	3.14663	48159	45742.3	53404.3
3.14972	43618.3	43260.7	50738.3	3.14972	45341.7	48083.3	54943.3	3.14972	48137.3	45720.7	53382.3
3.15278	43607.3	43239	50716.7	3.15278	45330.7	48072.3	54932.3	3.15278	48126.7	45710	53371.7
3.15583	43607.3	43239	50727.7	3.15583	45320	48072.3	54910.7	3.15583	48126.7	45699.3	53350
3.15885	43585.7	43239	50706	3.15885	45320	48061.7	54910.7	3.15885	48105	45688.3	53328.3
3.16185	43585.7	43206.7	50706	3.16185	45298.3	48029	54888.7	3.16185	48094	45677.3	53317.7
3.16483	43585.7	43206.7	50695	3.16483	45298.3	48018.3	54878	3.16483	48083	45677.3	53307
3.1678	43564.3	43206.7	50673.3	3.1678	45287.3	47996.7	54867.3	3.1678	48072.3	45656	53285
3.17074	43564.3	43184.7	50673.3	3.17074	45266	47985.7	54856.7	3.17074	48051	45656	53285
3.17366	43553.3	43195.7	50641	3.17366	45266	47975	54845.7	3.17366	48051	45645	53274.3
3.17656	43542.3	43174	50630	3.17656	45244.3	47964.3	54823.7	3.17656	48029	45634	53241.7
3.17944	43531.3	43174	50630	3.17944	45244.3	47964.3	54813	3.17944	48040	45612.3	53231
3.18231	43520.7	43152.7	50619.3	3.18231	45233.3	47964.3	54813	3.18231	48018	45601.3	53220
3.18515	43510	43152.7	50608.3	3.18515	45211.7	47931.7	54780.7	3.18515	47986	45590.7	53198.3
3.18798	43510	43152.7	50597.3	3.18798	45201	47931.3	54780.7	3.18798	47986	45569.3	53187.7
3.19079	43499	43130.7	50576	3.19079	45201	47921	54780.7	3.19079	47975	45580	53166
3.19358	43477.3	43119.7	50576	3.19358	45179	47921	54759	3.19358	47953.3	45558.3	53155
3.19635	43477.3	43119.7	50565	3.19635	45179	47888	54748	3.19635	47942.3	45547.3	53133.3
3.1991	43466.7	43098.3	50543.3	3.1991	45168.3	47877.3	54737.3	3.1991	47942.3	45547.3	53122.7
3.20184	43456	43098.3	50532.3	3.20184	45157.7	47877.3	54715.7	3.20184	47942.3	45526	53101
3.20456	43434	43087.7	50521.3	3.20456	45146.7	47877.3	54704.7	3.20456	47910	45526	53090.3
3.20726	43434	43098.3	50532.3	3.20726	45135.7	47866.3	54704.7	3.20726	47910	45515	53079.3
3.20995	43423	43065.7	50500	3.20995	45135.7	47845	54683	3.20995	47899	45504	53068.7
3.21262	43412.3	43065.7	50500	3.21262	45125	47845	54672	3.21262	47877.3	45493.3	53035.7
3.21527	43401.7	43044	50478.3	3.21527	45103.3	47834.3	54650.7	3.21527	47877.3	45482.3	53025
3.21791	43391	43044	50467.3	3.21791	45103.3	47834	54628.7	3.21791	47855.3	45471.7	53003.3
3.22053	43401.7	43033.3	50456.3	3.22053	45081.7	47812.3	54618	3.22053	47855.3	45460.7	53014
3.22314	43380	43022.3	50445.7	3.22314	45081.7	47801.7	54596.3	3.22314	47855.3	45460.7	52992.7
3.22573	43347.3	43011.7	50435	3.22573	45071	47790.7	54585.3	3.22573	47823.3	45450	52981.7
3.2283	43347.3	43000.7	50435	3.2283	45060	47790.7	54585.3	3.2283	47812.3	45439	52960.3
3.23086	43347.3	42990	50402.3	3.23086	45070.7	47780	54563.7	3.23086	47801.3	45428	52949.3
3.23341	43347.3	42990	50402.3	3.23341	45038.3	47758.3	54563.7	3.23341	47801.3	45428	52927.3
3.23594	43347.3	42979	50391.7	3.23594	45038	47758.3	54531.3	3.23594	47779.7	45406.7	52906
3.23845	43315	42979	50380.7	3.23845	45038	47736.3	54531.3	3.23845	47779.7	45406.7	52895
3.24095	43315	42968	50359	3.24095	45005.7	47725.7	54498.7	3.24095	47779.7	45406.7	52873.7
3.24344	43315	42946.7	50359	3.24344	45016.3	47725.7	54498.7	3.24344	47747.3	45384.7	52851.7
3.24591	43293.3	42936	50359	3.24591	45016.3	47715	54509.3	3.24591	47747.3	45384.7	52851.7
3.24837	43293.3	42935.7	50348	3.24837	45005.3	47704	54488	3.24837	47725.7	45374	52851.7
3.25082	43260.7	42925	50337	3.25082	44984	47693.3	54477.3	3.25082	47714.7	45352.7	52819.3
3.25325	43271.3	42903	50326.3	3.25325	44994.7	47682.3	54466.3	3.25325	47714.7	45352.7	52808.3
3.25566	43260.7	42914	50305	3.25566	44984	47693.3	54455.3	3.25566	47703.7	45352.7	52808.3
3.25807	43260.7	42892.3	50294	3.25807	44973	47671.3	54444.3	3.25807	47693	45341.7	52786.7
3.26046	43250	42892.3	50294	3.26046	44962.3	47671.3	54433.7	3.26046	47682.3	45341.7	52786.3
3.26284	43228.3	42881.7	50272.3	3.26284	44951.3	47650	54412.3	3.26284	47660.7	45330.7	52765
3.2652	43217.3	42881.3	50261.3	3.2652	44940.3	47650	54412	3.2652	47649.7	45320	52754
3.26755	43217.3	42860	50250.3	3.26755	44919	47639	54390.3	3.26755	47638.7	45298.3	52743
3.26989	43206.7	42860	50250.3	3.26989	44919	47628.3	54379.3	3.26989	47617.3	45320	52721.3
3.27222	43196	42838.3	50218.3	3.27222	44919	47617.3	54379.3	3.27222	47617.3	45298.3	52710.7
3.27453	43196	42838.3	50218.3	3.27453	44919	47617.3	54347	3.27453	47617.3	45287.3	52710.7
3.27683	43174	42827.3	50207.3	3.27683	44908	47606.3	54336.3	3.27683	47595.7	45265.7	52678
3.27912	43163	42816.3	50196.3	3.27912	44886.3	47595.7	54325.3	3.27912	47585	45276.3	52667.3
3.2814	43163	42805.7	50174.7	3.2814	44875.7	47585	54314.3	3.2814	47574	45265.7	52667.3
3.28367	43141.7	42795	50164	3.28367	44875.7	47574.3	54314.7	3.28367	47552.3	45254.7	52656.3
3.28592	43131	42795	50164	3.28592	44854	47563.3	54293	3.28592	47541.3	45244	52634.7
3.28816	43120	42762.3	50142	3.28816	44864.7	47541.7	54293	3.28816	47541.3	45244	52635
3.2904	43120	42762.3	50142.3	3.2904	44832.3	47541.7	54293	3.2904	47541.3	45233.3	52613
3.29261	43120	42762.3	50110	3.29261	44832.3	47530.7	54260.3	3.29261	47520	45233.3	52602
3.29482	43098.3	42751.7	50120.7	3.29482	44832	47519.7	54238.7	3.29482	47520	45222.3	52591.3
3.29702	43087.3	42741	50088	3.29702	44810.7	47519.7	54238.7	3.29702	47509	45200.7	52570
3.29921	43087.3	42729.7	50088	3.29921	44800	47509	54228	3.29921	47498	45190	52559
3.30138	43065.7	42719	50077	3.30138	44800	47509	54217	3.30138	47498	45200.7	52537.3
