# Supplementary material for: Different pruning level effects on flowering period and chlorophyll fluorescence parameters of Loropetalum chinense var. rubrum
Source: PeerJ journal article supplement (doi:10.7717/peerj.13406), 2022-05-10
Supplement: File5.pdf [file File5.pdf]

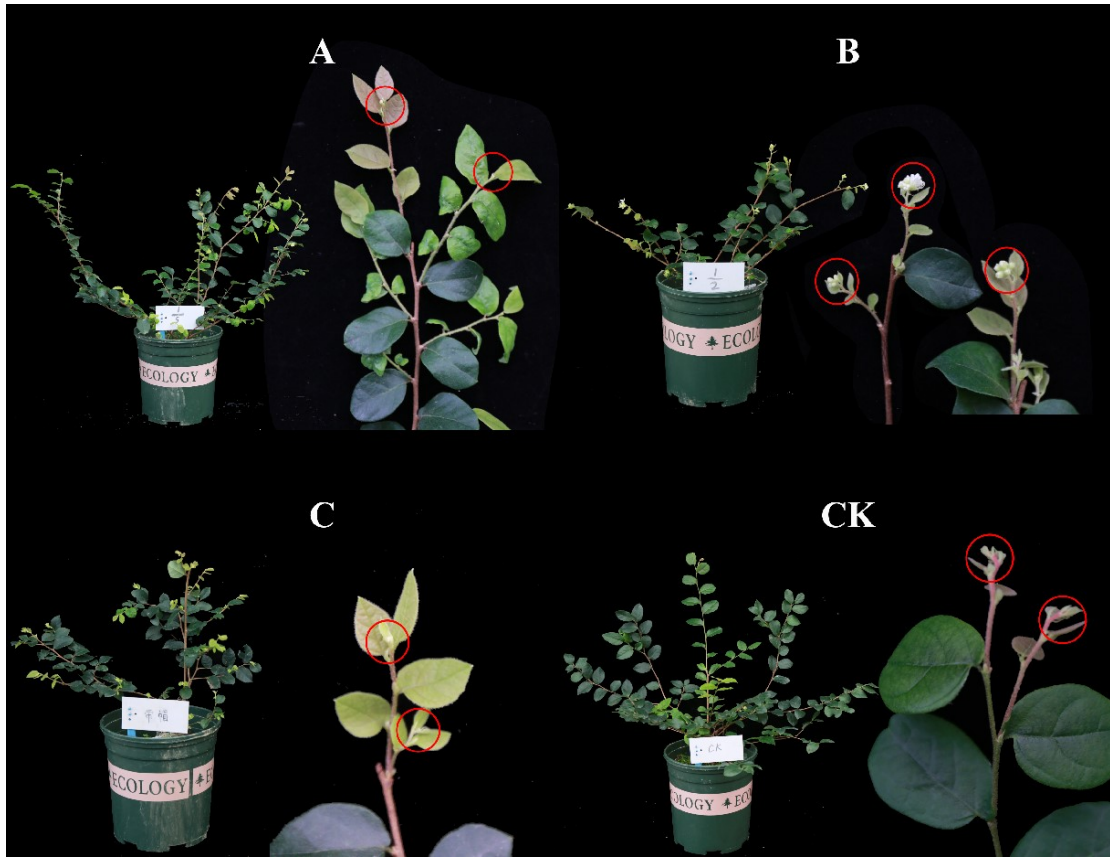

Figure 1. Comparison photos of the treatment group and the control group at the first flowering stage of "Xiangnong Xiangyun"

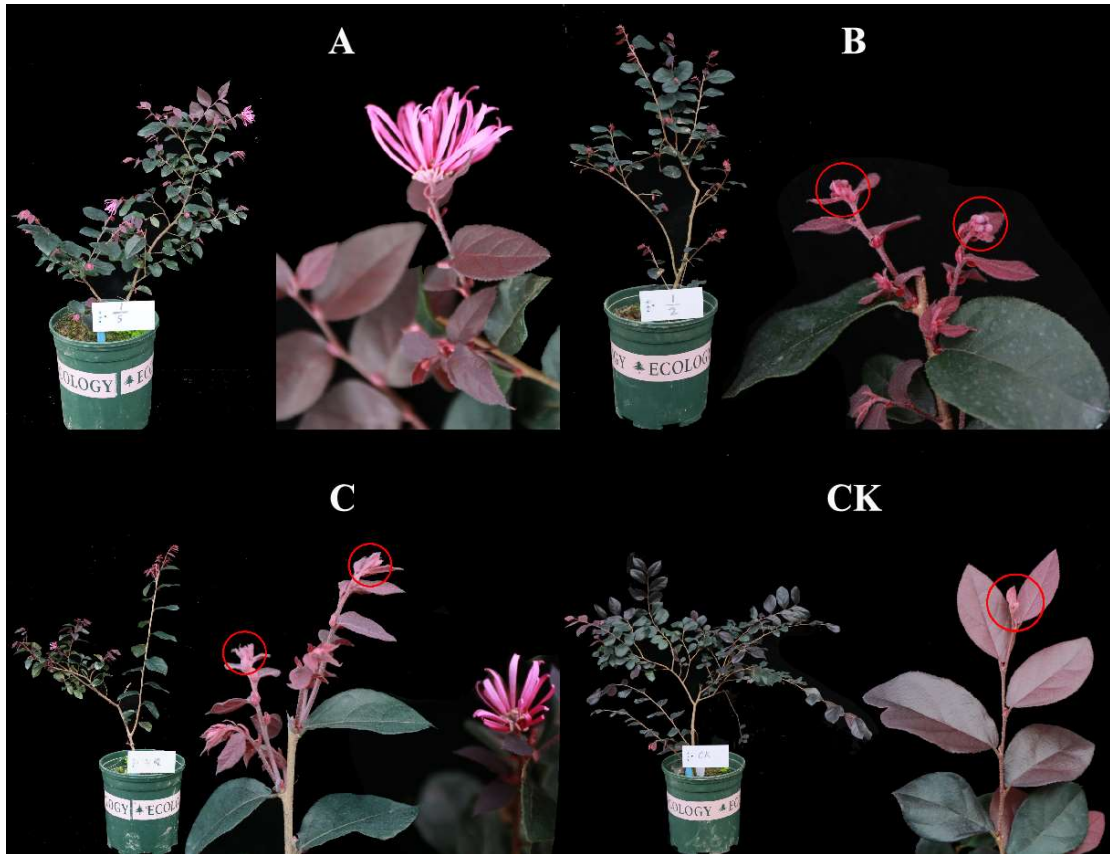

Figure 2. Comparison photos of the treatment group and the control group at the first flowering stage of "Da Yehong"

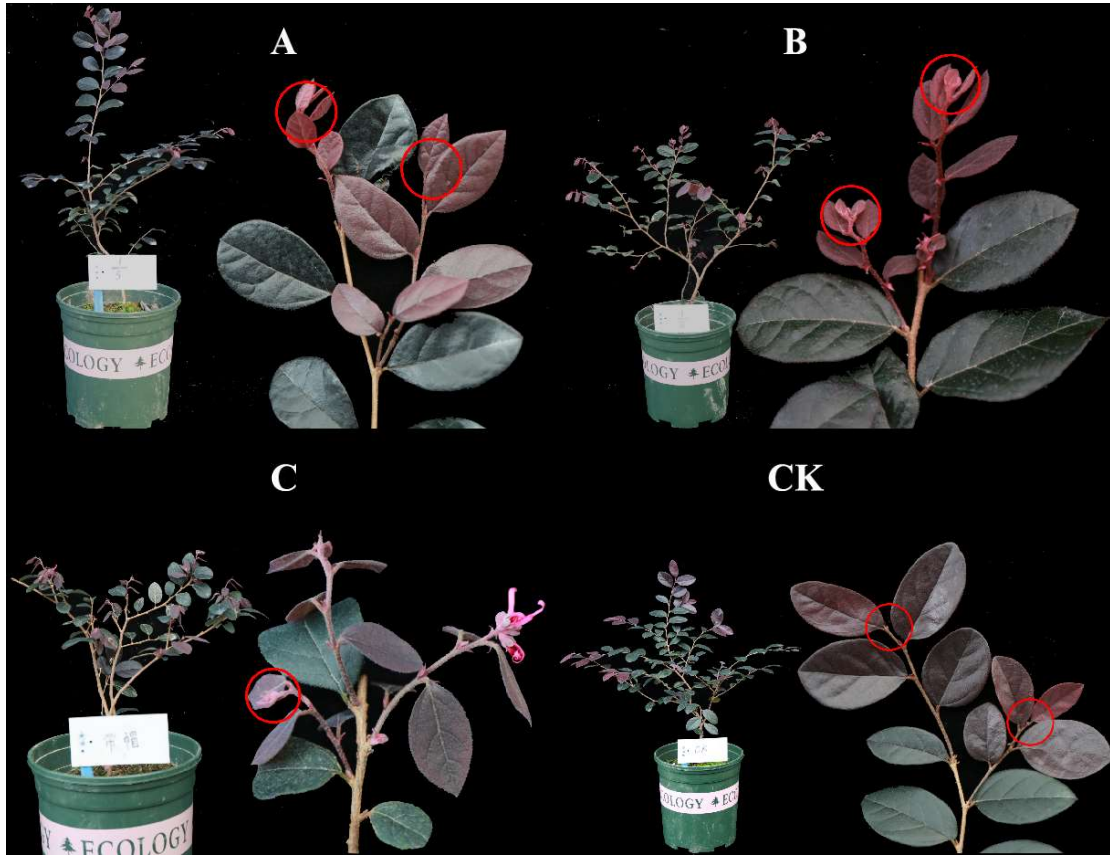

Figure 3. Comparison photos of the treatment group and the control group at the first flowering stage of "Hei Zhenzhu"
