# Supplementary material for: Different pruning level effects on flowering period and chlorophyll fluorescence parameters of Loropetalum chinense var. rubrum
Source: PeerJ journal article supplement (doi:10.7717/peerj.13406), 2022-05-10
Supplement: File6.pdf [file File6.pdf]

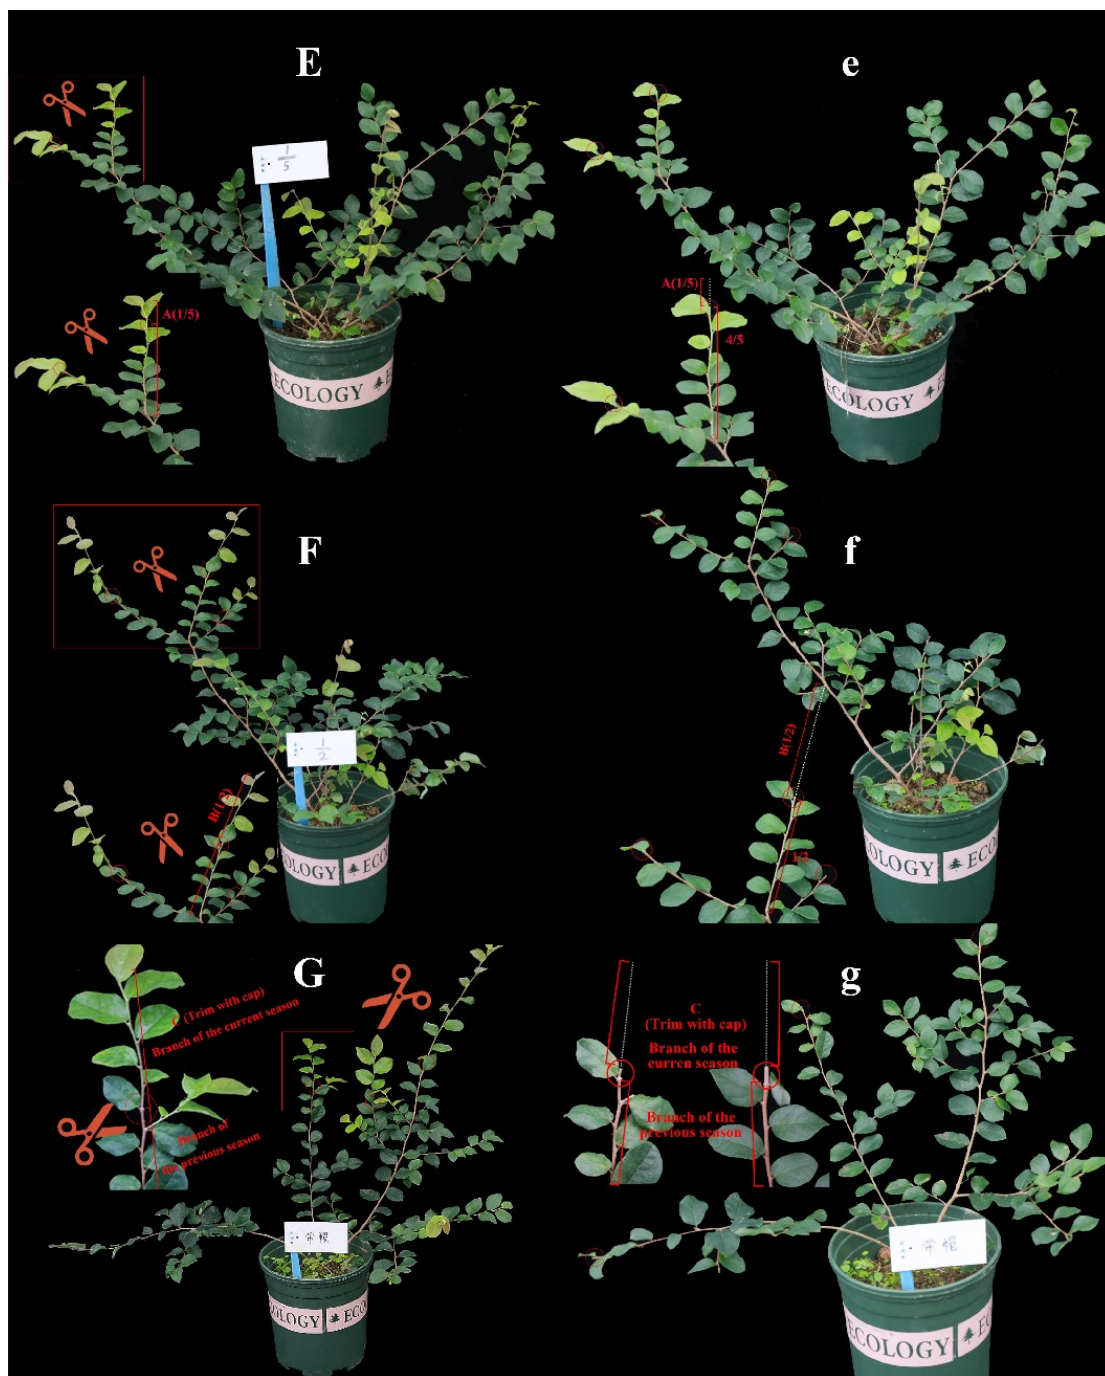

Figure 1. Comparison of "Xiangnong Xiangyun" before and after pruning  
**Note:** Capital letters indicate before pruning; Lowercase letters indicate after pruning; 'E' stands for 'A' experimental group, 'F' stands for 'B' experimental group, 'G' stands for 'C' experimental group.

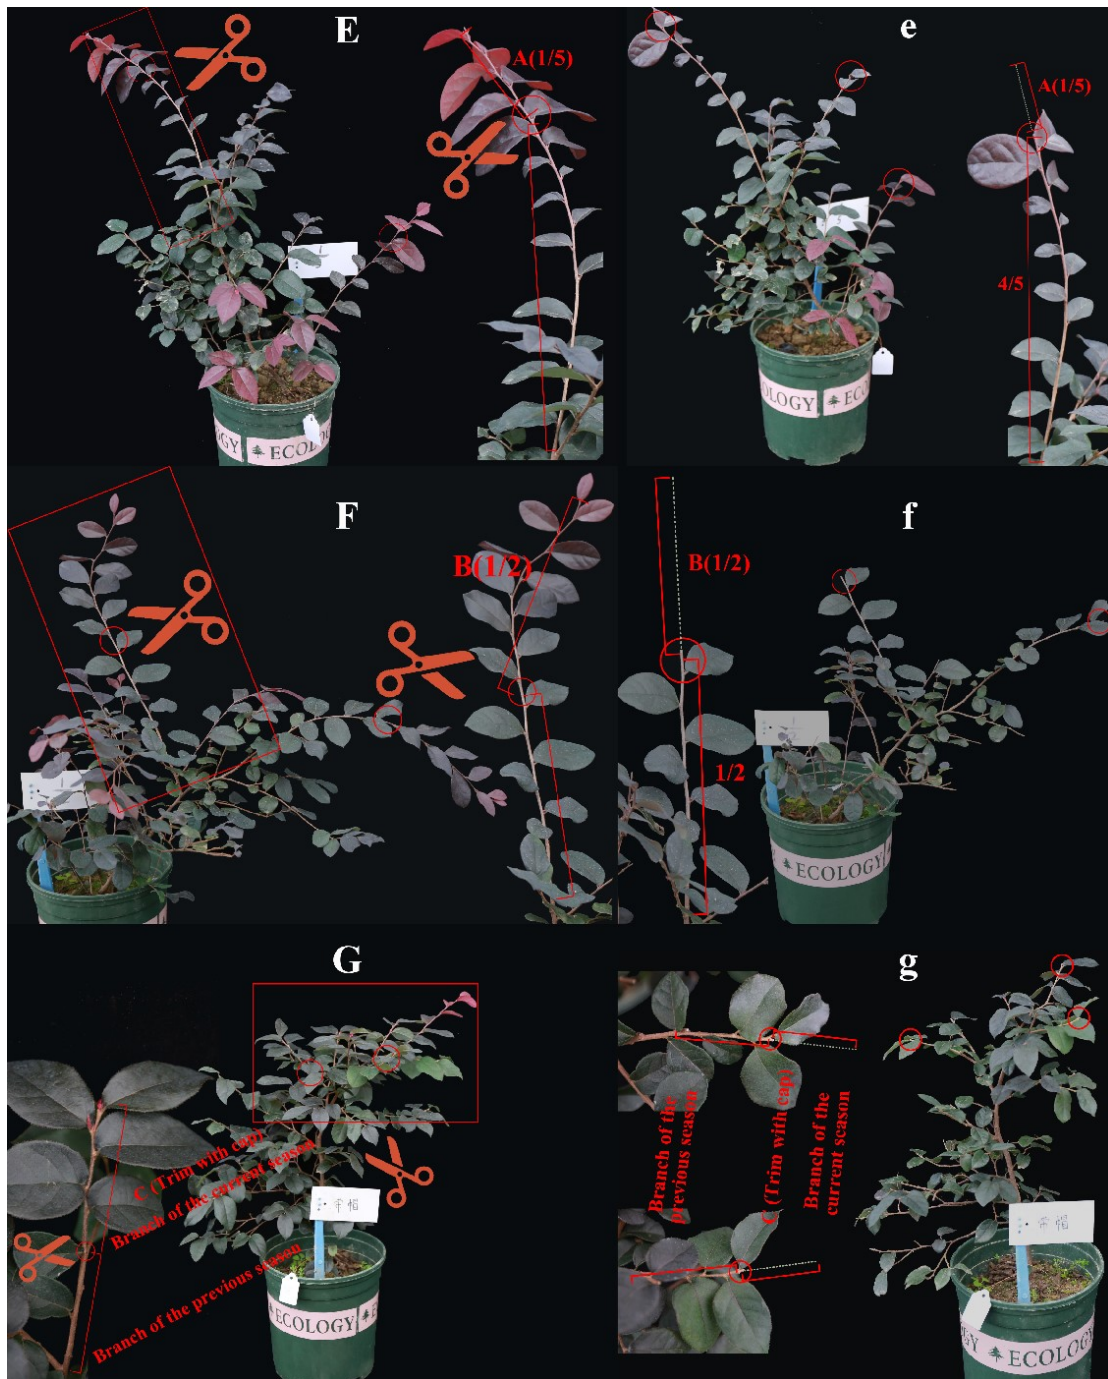

Figure 2. Comparison of "Da Yehong" before and after pruning

**Note:** Capital letters indicate before pruning; Lowercase letters indicate after pruning; 'E' stands for 'A' experimental group, 'F' stands for 'B' experimental group, 'G' stands for 'C' experimental group.

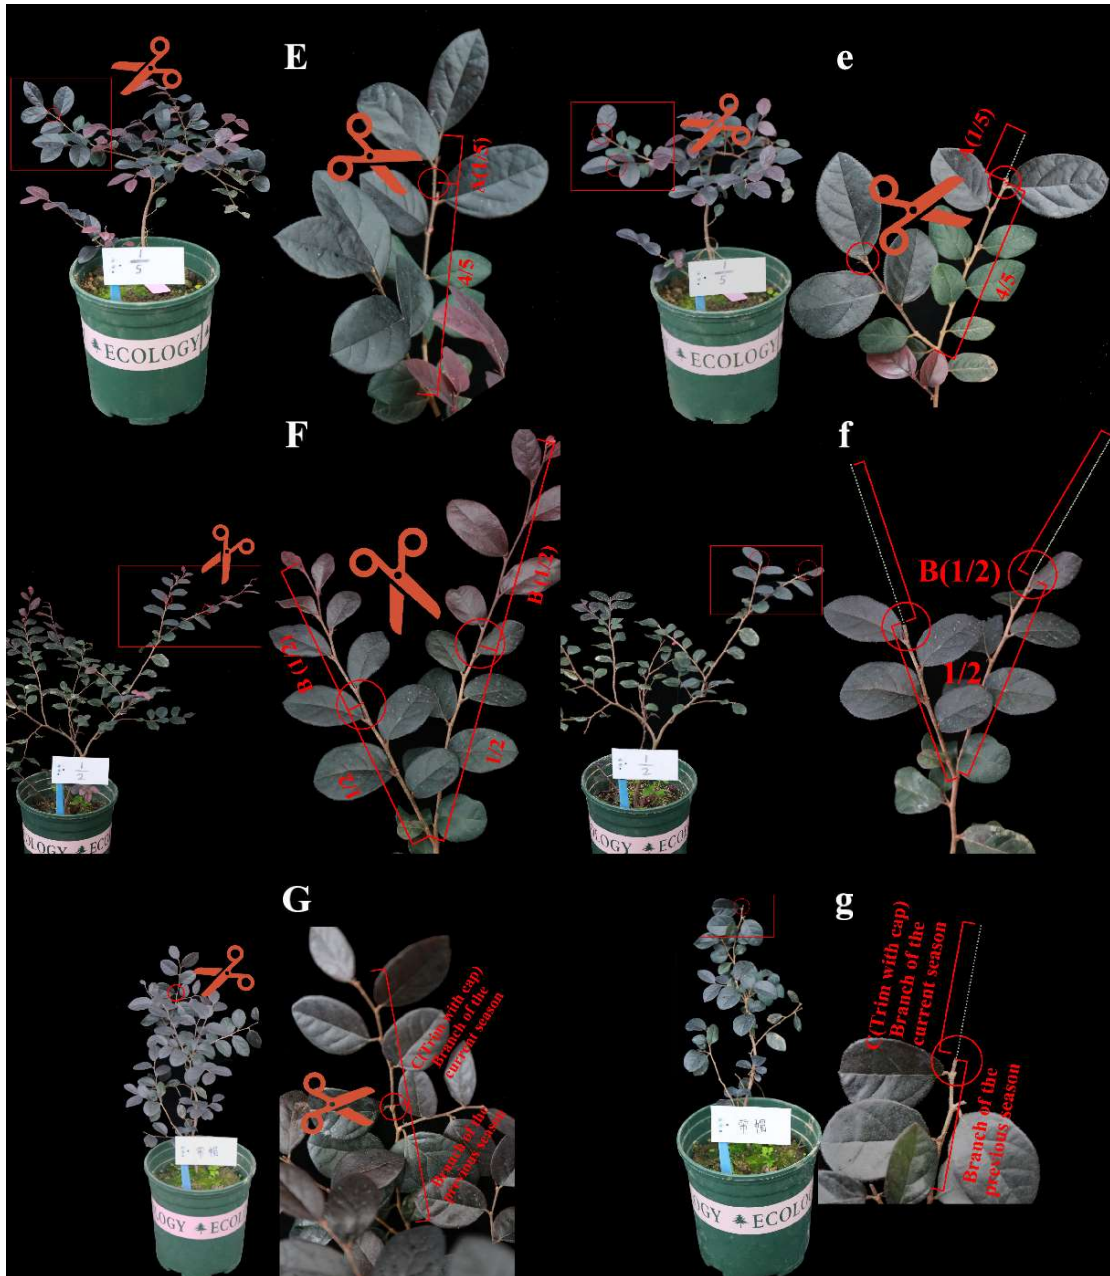

Figure 3. Comparison of "Hei Zhenzhu" before and after pruning  
**Note:** Capital letters indicate before pruning; Lowercase letters indicate after pruning; 'E' stands for 'A' experimental group, 'F' stands for 'B' experimental group, 'G' stands for 'C' experimental group.
